# Supplementary material for: Profiling IgG and IgA antibody responses during vaccination and infection in a high-risk gonorrhoea population
Source: PubMed Central journal article supplement (PMC11306574; doi:10.1038/s41467-024-51053-x), 2024-08-07
Supplement: 41467_2024_51053_MOESM1_ESM.pdf [file 41467_2024_51053_MOESM1_ESM.pdf]

## Supplementary Information

### Contents

|                                                                                                                         |    |
|-------------------------------------------------------------------------------------------------------------------------|----|
| Figure S1 Heatmaps of vaccine recipient responses.....                                                                  | 2  |
| Figure S2 tSNE separation of Opa antigens.....                                                                          | 3  |
| Figure S3 Alignment of sequences of Opa proteins used in the microarray.....                                            | 4  |
| Figure S4 Example correlations of IgG and IgA responses in the vaccinated cohort for selected Opa protein variants..... | 5  |
| Figure S5 PCA analysis applied to IgG and IgA immunoprofiles in the vaccinated cohort at the 10 weeks timepoint. ....   | 6  |
| Figure S6 PCA analysis applied to IgG and IgA immunoprofiles in the vaccinated cohort at the 24 weeks timepoint. ....   | 7  |
| Figure S7 Violin plots of bactericidal activity (% recovery) at three serum dilutions. ....                             | 8  |
| Figure S8 Violin plots of ELISpot activity. ....                                                                        | 9  |
| Table S1 Peptides used in ELISpot assays.....                                                                           | 10 |
| Clinical Trial Protocol .....                                                                                           | 11 |

**Figure S1 Heatmaps of vaccine recipient responses.** Antigens are ordered in columns, with the same order used for each block. Participants are numbered in rows (numbering is arbitrary). The viridis colour scheme is used, with lowest signals purple/blue, through to yellow for the highest responses. Arrows indicate columns of highly reacting antigens.

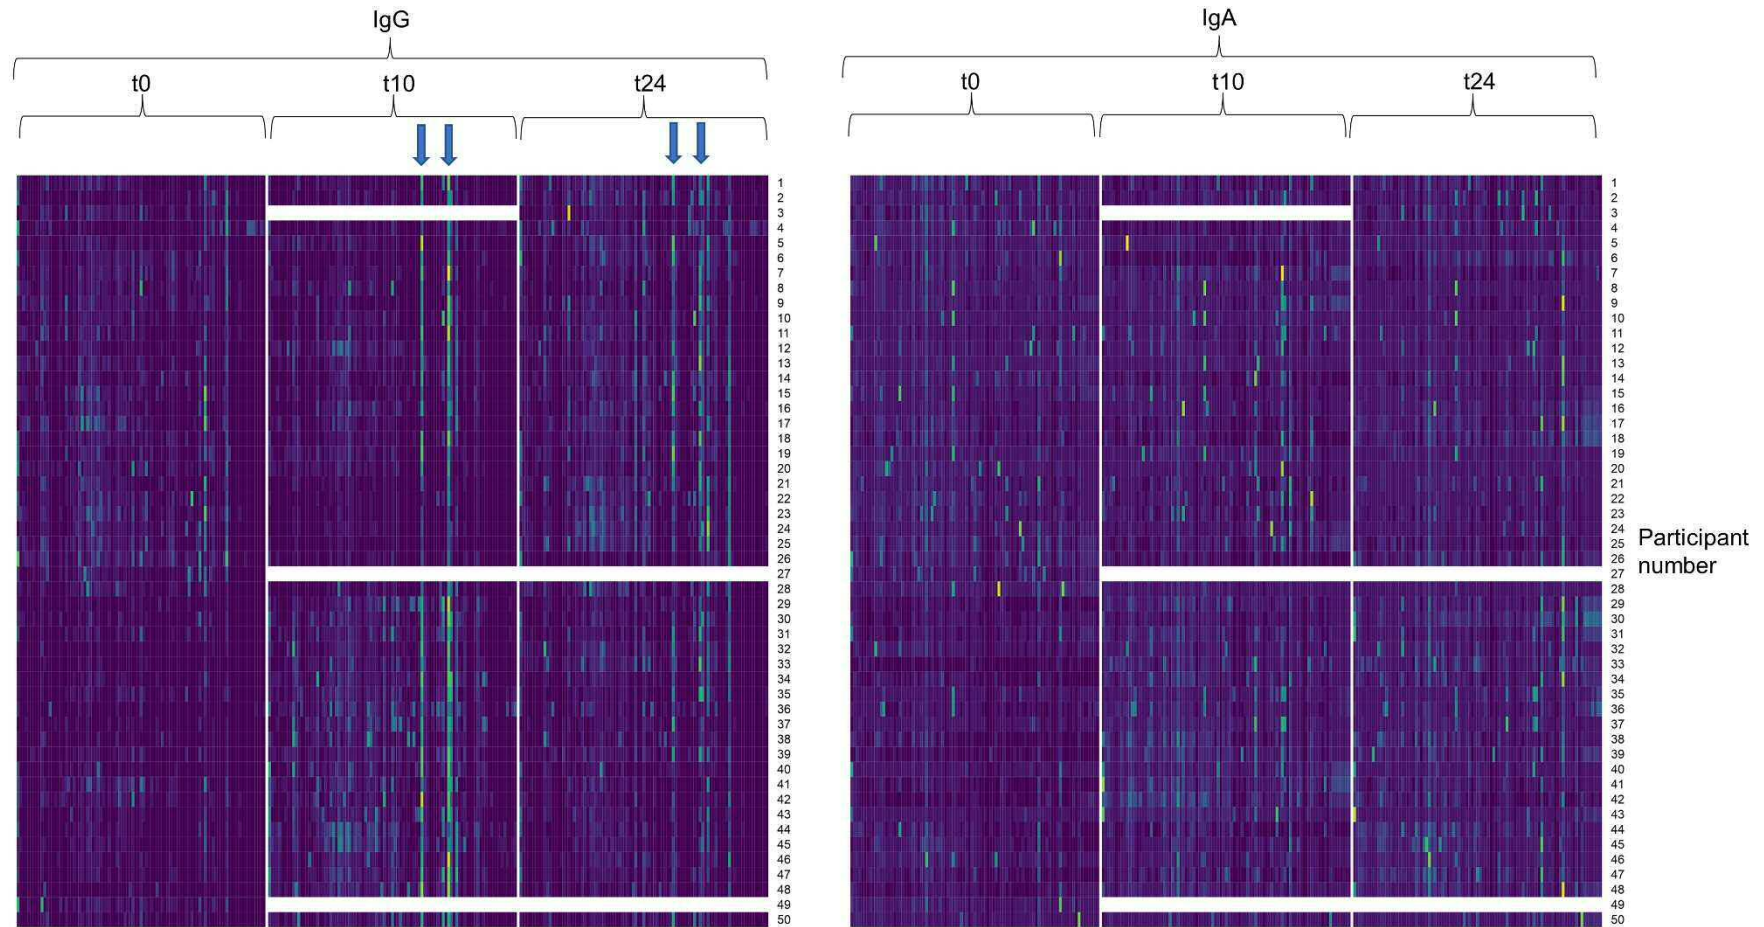

**Figure S2 tSNE separation of Opa antigens.** The plots use the same data from Fig 3B and C; Opa variants are labelled (sequences in Fig S3). The OpaD/Opa9/Opa58 grouping is circled in red.

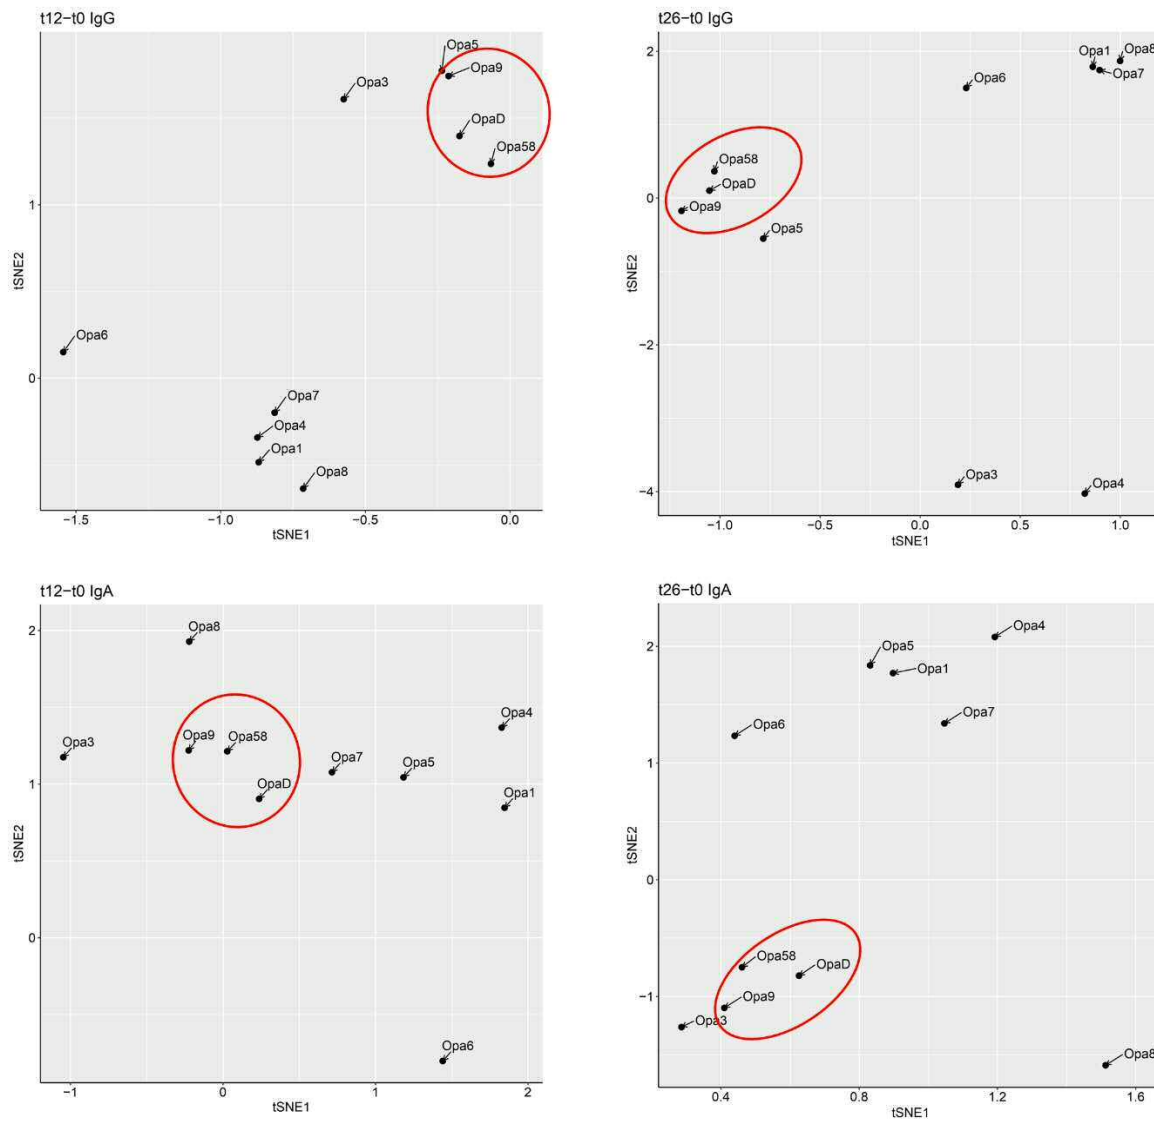

**Figure S3 Alignment of sequences of Opa proteins used in the microarray.** Alignment was carried out using Clustalx. Of the 11 Opas in the genome two were identical in sequence (Opa2 and Opa7); Opa2 was removed. OpaD/Opa9/Opa58 tend to cluster together in tSNE plots (Fig S2) and are highlighted in yellow. The second hypervariable loop region is highlighted in red for these variants.

|       |                                                              |     |
|-------|--------------------------------------------------------------|-----|
| Opa7  | MKETAAAKFERQHMDSPDLGTDDDKAMA-----VQADLAYAAERITHDYPEPTGA      | 50  |
| Opa1  | MKETAAAKFERQHMDSPDLGTDDDKAMA-----VQADLAYAAERITHDYPEPTGA      | 50  |
| Opa3  | MKETAAAKFERQHMDSPDLGTDDDKAMA-----VQADLAYAYEHI TRDYPDAAGA     | 50  |
| Opa4  | MKETAAAKFERQHMDSPDLGTDDDKAMA-----VQADLAYAAERITHDYPEPTGT      | 50  |
| Opa5  | MKETAAAKFERQHMDSPDLGTDDDKAMA-----VQADLAYAAERITHDYPEPTGA      | 50  |
| Opa8  | MKETAAAKFERQHMDSPDLGTDDDKAMA-----VQADLAYAYEHI TRDYPDAAGA     | 50  |
| Opa6  | MKETAAAKFERQHMDSPDLGTDDDKAMA-----VQADLAYAYEHI TRDYPDAAGA     | 50  |
| OpaD  | MKETAAAKFERQHMDSPDLGTDDDKAMAASEGNRGPYVQADLAYAAERITHDYPEPTAP  | 60  |
| Opa9  | MKETAAAKFERQHMDSPDLGTDDDKAMA-----VQADLAYAAERITHDYPEPTAP      | 50  |
| Opa58 | MKETAAAKFERQHMDSPDLGTDDDKAMAASEGNRGPYVQADLAYAAERITHDYPEPTAP  | 60  |
|       | ***** *:*:*:*: .:                                            |     |
| Opa7  | KKDKKISTVSDYFRNIRTHSVHPRVSVGYDFGWSRIAADYARYRKWNNKYSVNIKRVE   | 110 |
| Opa1  | KKG-KISTVSDYFRNIRTHSIHPRVSVGYDFGGWRIAADYARYRKWNNKYSVNTKKVNE  | 109 |
| Opa3  | NQGKKISTVSDYFKNIRTHSIHPRVSVGYDFGGWRIAADYARYRKWNDNKYSVDIKELEN | 110 |
| Opa4  | KK-DKISTVSDYFRNIRTHSIHPRVSVGYDFGGWRIAADYARYRKWNNKYSVNTKKVNE  | 109 |
| Opa5  | KKG-KISTVSDYFRNIRTHSIHPRVSVGYDFGGWRIAADYARYRKWNDNKYSVNIKELGR | 109 |
| Opa8  | NQGKKISTVSDYFKNIRTRSVHPRLAFGYDFGGWRIAADYARYRKWHNNKYSVNIKELGR | 110 |
| Opa6  | NKG-KISTVSDYFRNIRTHSIHPRVSVGYDFGGWRIAADYARYRKWHNNKYSVNIKELER | 109 |
| OpaD  | GKN-KISTVSDYFRNIRTHSIHPRVSVGYDFGGWRIAADYARYRKWHNNKYSVNIKELER | 119 |
| Opa9  | GKN-KISTVSDYFRNIRTHSIHPRVSVGYDFGGWRIAADYARYRKWNDNKYSVDIKELEN | 109 |
| Opa58 | GKN-KISTVSDYFRNIRTHSIHPRVSVGYDFGGWRIAADYARYRKWNDNKYSVDIKELEN | 119 |
|       | : *****:*:*:*:*:*****.*****:*****:*****:*.:.:                |     |
| Opa7  | NNGSGK----KLTQDLKTENQENGFHAVSSLGLSAVYDFDTGSRFKPYAGVRVSYGHVR  | 166 |
| Opa1  | NKGEKI----NVTQYLKAENQENGFHAVSSLGLSAVYDFKLNDFKPKYIGMRVGYGHVR  | 165 |
| Opa3  | KNQN-----KRDLKTENQENGSFHAVSSLGLSAVYDFKLNDFKPKYIGARVAYGHVR    | 162 |
| Opa4  | NKGEKI----NVTQYLKAENQENGFHAVSSLGLSAVYDFKLNDFKPKYIGARVAYGHVR  | 165 |
| Opa5  | KDGTSSSGRYLNIQTRKTENQENGFHAVSSLGLSTVYDFRANDFKPKYIGVRVAYGHVR  | 169 |
| Opa8  | NDNSASDSKHLNIKTQKTEHQENGFHAVSSLGLSTVYDFRANDFKPKYIGVRVAYGHVR  | 170 |
| Opa6  | KNNKTFGGNQLNIKYQKTEHQENGFHAVSSLGLSTVYDFRVNDFKPKYIGVRVGYGHVR  | 169 |
| OpaD  | KNNKTFGGNQLNIKYQKTEHQENGFHAVSSLGLSAVYDFKLNDFKPKYIGARVAYGHVR  | 179 |
| Opa9  | KNQN-----KRDLKTENQENGSFHAVSSLGLSAVYDFKLNDFKPKYIGARVAYGHVR    | 161 |
| Opa58 | KNQN-----KRDLKTENQENGSFHAVSSLGLSAVYDFKLNDFKPKYIGARVAYGHVR    | 171 |
|       | :. : *:*:*:*:*:*****:***** .:***** * **.******               |     |
| Opa7  | HSIDSTKKTVDVITAPPTSDGAPTTYN----ANPQTQNPYHQSDSIRRVLGVIAGVGF   | 222 |
| Opa1  | HQVRSVEQETTTVTTYL--QSGKPSPIV----RGSTLKLPHHESRSSRRLGFGAMAGVGI | 219 |
| Opa3  | HSIDSTKKTTEFLTAAG--QDGGAPTIV----NNGSTQDAHQESDSIRRVLGVIAGIGF  | 216 |
| Opa4  | HSIDSTKKTTEFLTAAG--QDGGAPTIV----NNGSTQDAHQESDSIRRVLGVIAGVGF  | 219 |
| Opa5  | HQVHSMEKETTTVTTYP--SDGSAK---TSVPSEMPKPAYHENRSSRRLGFGAMAGVGI  | 224 |
| Opa8  | HQVHSMEKETTTVTTYP--SDGSAK---TSVPSEMPKPAYHENRSSRRLGFGAMAGVGI  | 225 |
| Opa6  | HGIDSTKKTNTLTAYH--SAGTKPTYDDIDSGKNQKNTYRQNRSSRRLGFGAMAGVGI   | 227 |
| OpaD  | HSIDSTKKITGTLTAYP--SDADAAV--TVYPDGHQPKNYQKSNSRRLGFGAMAGVGI   | 235 |
| Opa9  | HSIDSTKKITGTLTAYP--SDADAAV--TVYPDGHQPKNYQKSNSRRLGFGAMAGVGI   | 217 |
| Opa58 | HSIDSTKKITGTLTAYP--SDADAAV--TVYPDGHQPKNYQKSNSRRLGFGAMAGVGI   | 227 |
|       | * : * :. :*:* . . : :. . * **:*:*:*:*:*                      |     |
| Opa7  | DITPNLTLDTGYRYHNWGRLENTFRFKTHEASLGMRYRF                      | 260 |
| Opa1  | DVAPGLTLDAGYRYHYWGRLENTFRFKTHEASLGVRYRF                      | 257 |
| Opa3  | DITPKLTLDTGYRYHNWGRLENTFRFKTHEASLGVRYRF                      | 254 |
| Opa4  | DITPNLTLDAGYRYHNWGRLENTFRFKTHEASLGMRYRF                      | 257 |
| Opa5  | DVAPGLTLDAGYRYHYWGRLENTFRFKTHEASLGMRYRF                      | 262 |
| Opa8  | DVAPGLTLDAGYRYHYWGRLENTFRFKTHEASLGVRYRF                      | 263 |
| Opa6  | DVAPGLTLDAGYRYHYWGRLENTFRFKTHEASLGVRYRF                      | 265 |
| OpaD  | DVAPGLTLDAGYRYHNWGRLENTFRFKTHEASLGMRYRF                      | 273 |
| Opa9  | DVAPGLTLDAGYRYHNWGRLENTFRFKTHEASLGMRYRF                      | 255 |
| Opa58 | DVAPGLTLDAGYRYHNWGRLENTFRFKTHEASLGMRYRF                      | 265 |
|       | *:* * **:*:*:*:*:*****:*****                                 |     |

**Figure S4 Example correlations of IgG and IgA responses in the vaccinated cohort for selected Opa protein variants.** Raw fluorescence values are plotted for A) IgG b) IgA. Points are coloured as follows: t0, black; t10, blue; t24 red. Left hand panels are for OpaD versus Opa9; right hand panels are for OpaD versus Opa58.

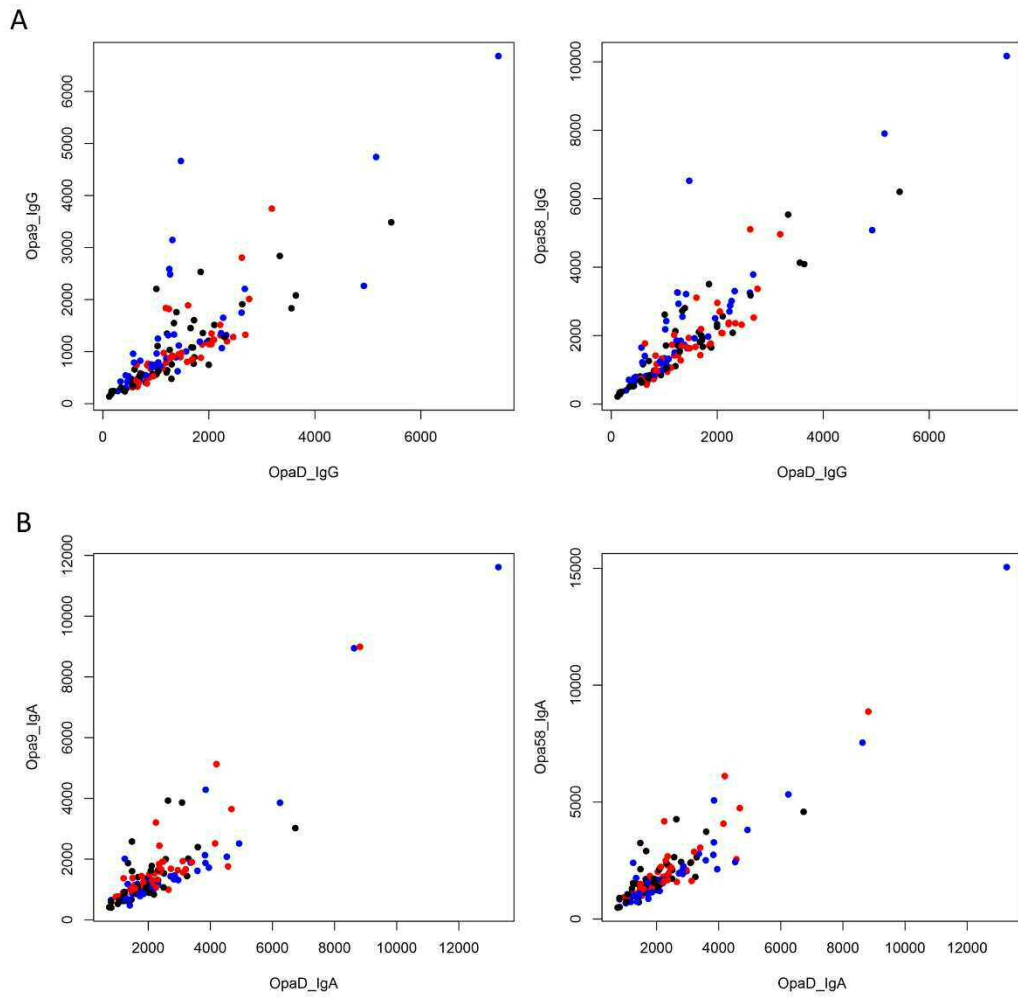

**Figure S5 PCA analysis applied to IgG and IgA immunoprofiles in the vaccinated cohort at the 10 weeks timepoint.** For each antigen, the increase in IgG or IgA response was calculated by subtraction of the 0 week timepoint (t0) from the 10 week timepoint (t10). PCA analysis was then carried out using the matrix of antigen responses (t10-t0) for each vaccinated individual (n=47). Points are coloured according to HIV status (positive/negative) or Sex (Female/Male). Ellipses are plotted for each group at 95% significance level, as implemented in factoextra. The centre of each ellipse is also included, as a larger symbol.

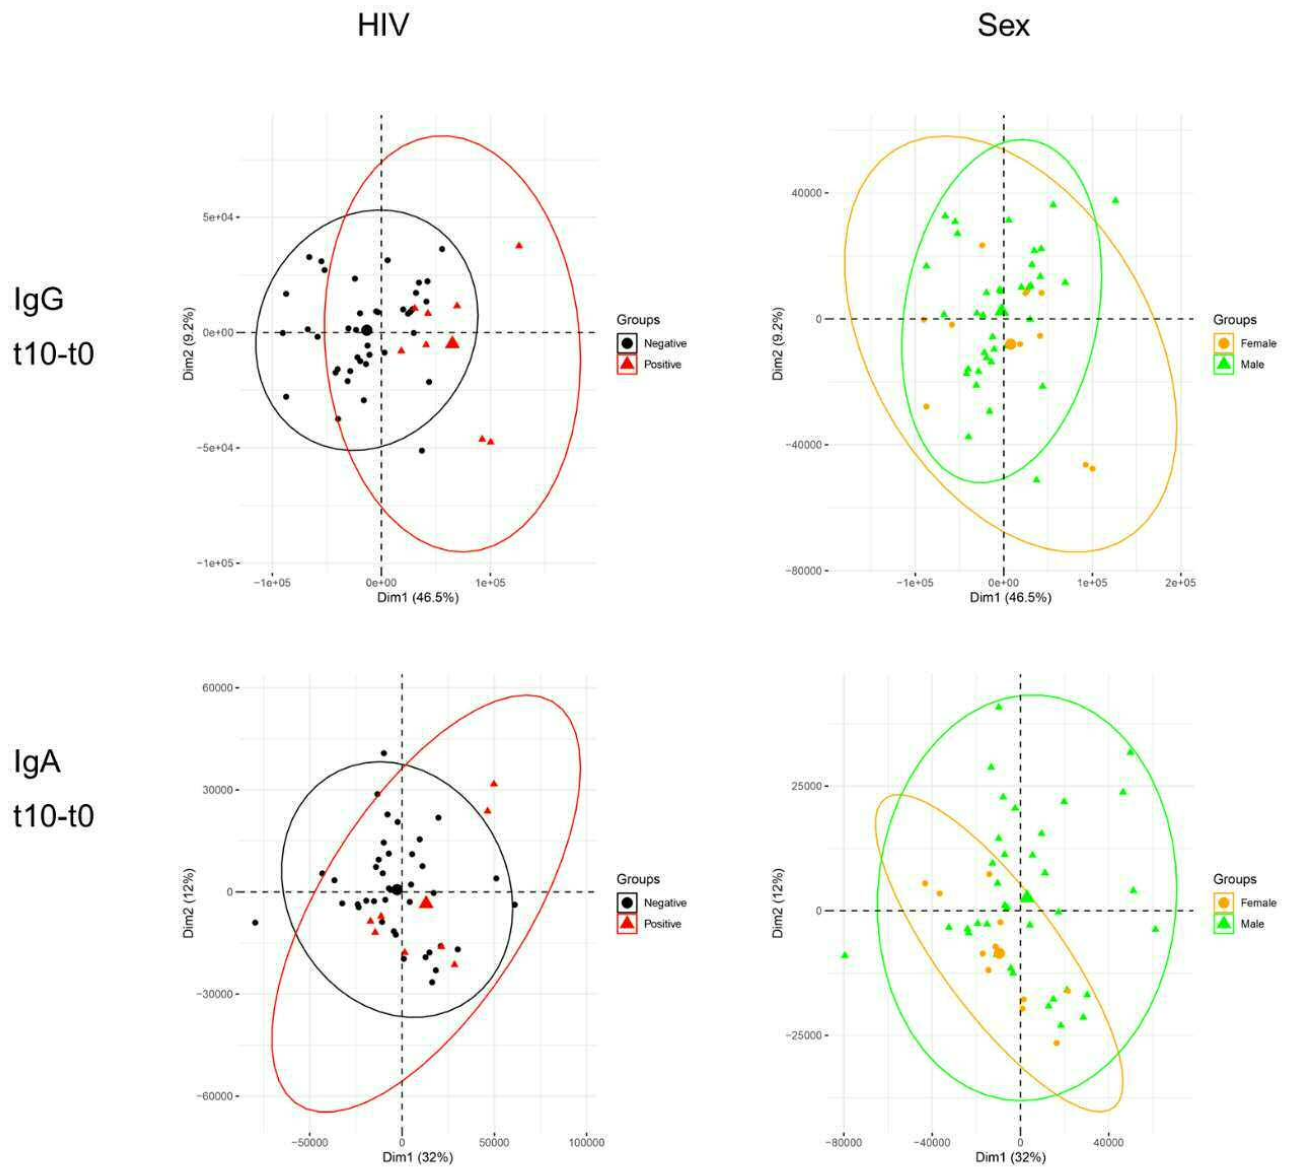

**Figure S6 PCA analysis applied to IgG and IgA immunoprofiles in the vaccinated cohort at the 24 weeks timepoint.** For each antigen, the increase in IgG or IgA response was calculated by subtraction of the 0 week timepoint (t0) from the 24 week timepoint (t24). PCA analysis was then carried out using the matrix of antigen responses (t24-t0) for each vaccinated individual (n=47). Points are coloured according to HIV status (positive/negative) or Sex (Female/Male).

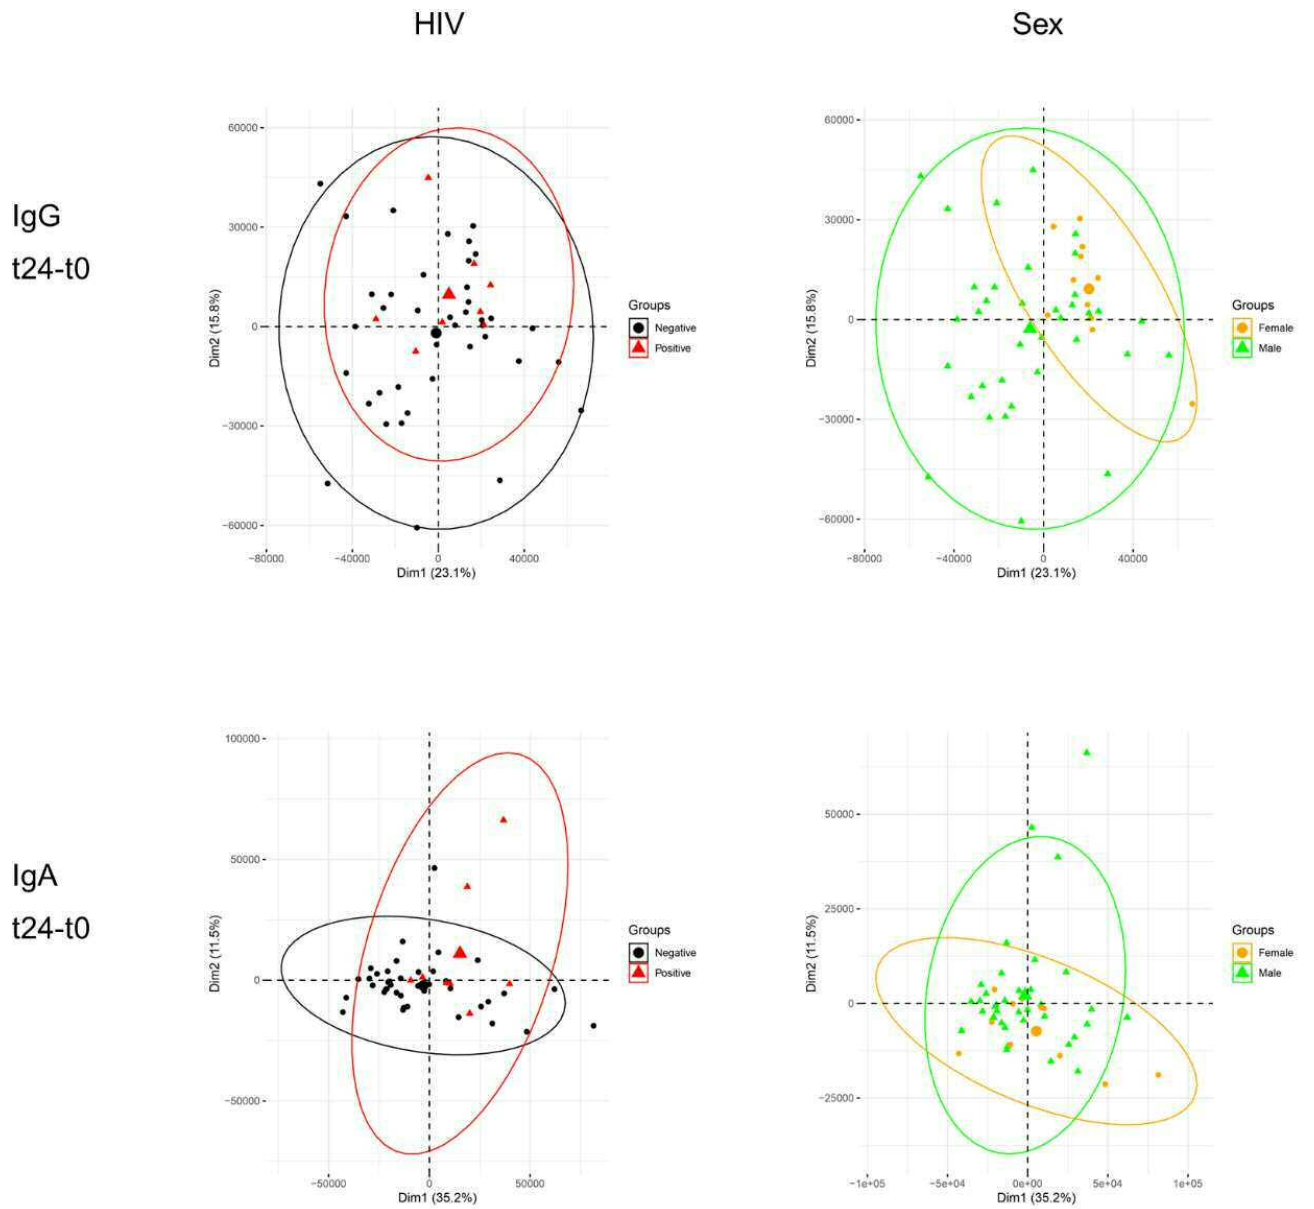

**Figure S7 Violin plots of bactericidal activity (% recovery) at three serum dilutions.** Box plots are superimposed on each violin plot, providing the median, two hinges which correspond to the first and third quartiles and 'whiskers' which extend to the 'outlier' points, which are plotted explicitly. n=47, for t0, t10 and t24. Low dilution: 1:480; Medium dilution: 1:960; High dilution: 1: 1,920.

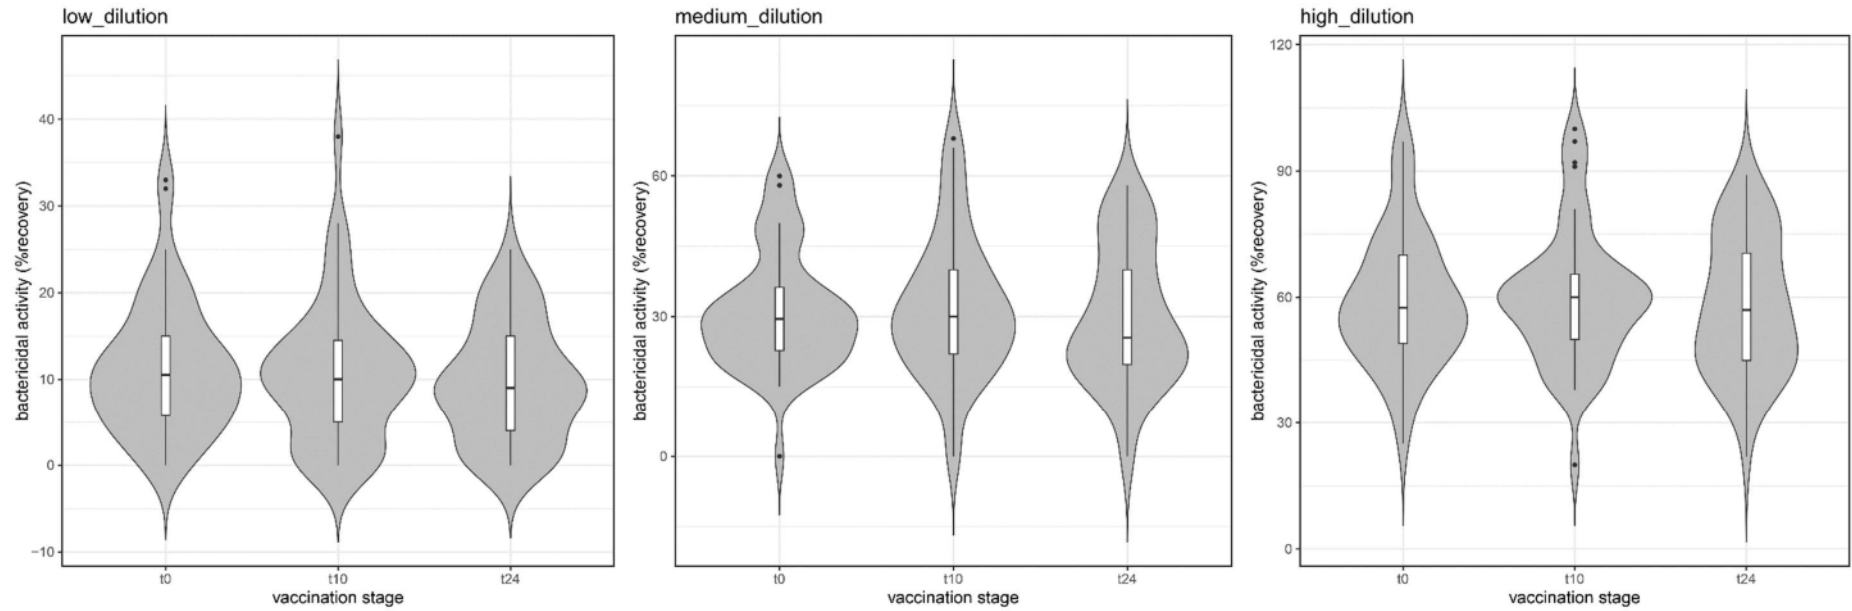



**Figure S8 Violin plots of ELISpot activity.** IFN $\gamma$ -Spot-Forming Units per 10<sup>6</sup> PBMC are plotted for each of the pooled peptides detailed in Table S1. Box plots are superimposed on each violin plot, providing the median, two hinges which correspond to the first and third quartiles and 'whiskers' which extend to the 'outlier' points, which are plotted explicitly. n=47, for t0, t10 and t24.

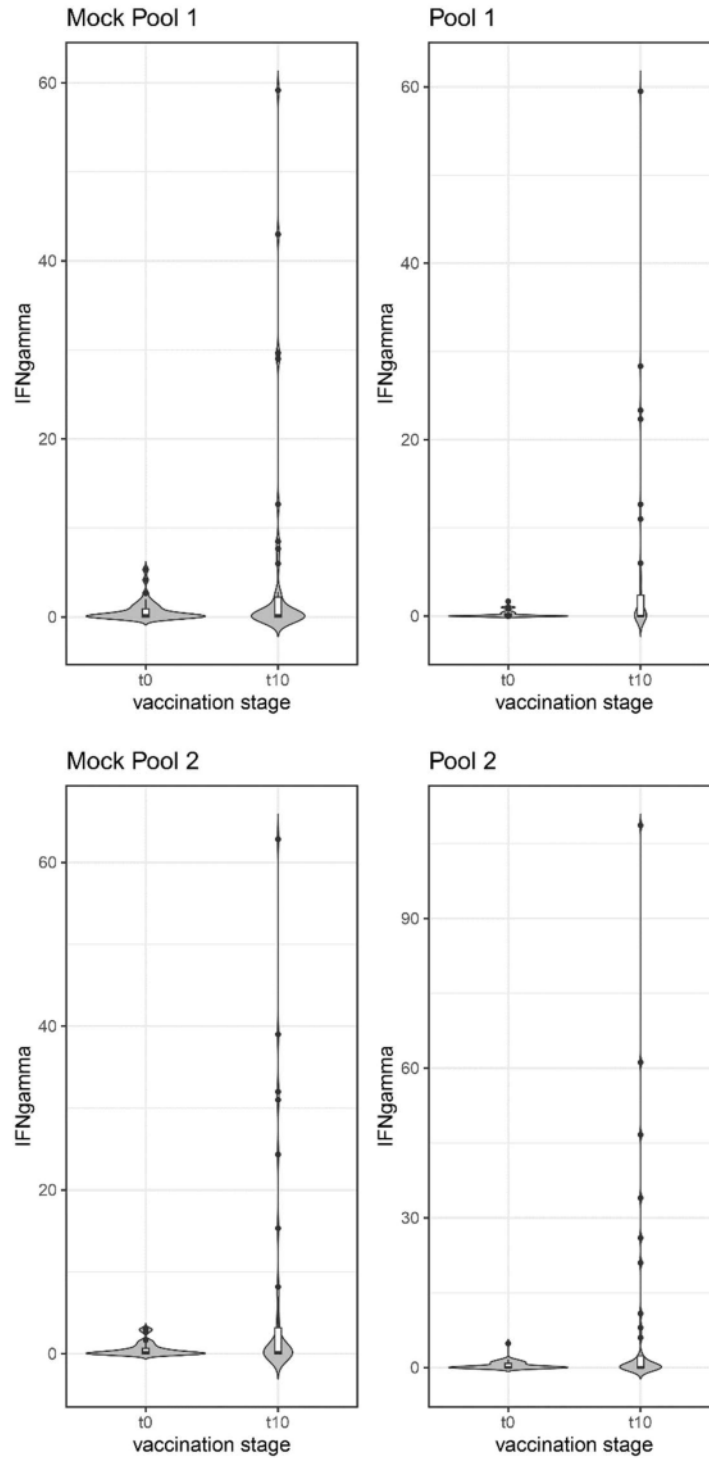

**Table S1 Peptides used in ELISpot assays**

| Antigen  | Name  | Sequence          | Name    | Scrambled Sequence | Peptide Pool |
|----------|-------|-------------------|---------|--------------------|--------------|
| NHBA     | NHBA1 | DFGRITNVGNSVVIDG  | NHBA1sc | GGDTFSVNVNVIDGNR   | 1            |
| NHBA     | NHBA2 | AKGEMLVGTAVYNGE   | NHBA2sc | NGLVKMYEAAEGGTV    | 1            |
| PorB     | PorB1 | ADKIVSTASAVVLRHKF | PorB1sc | IKAAASVVFRLVKHDST  | 1            |
| PorB     | PorB2 | KRTSALVSAGWLQRG   | PorB2sc | SKRTAWLASGGQVLR    | 1            |
| PilQ     | PilQ  | TDRRELLIFITPRII   | PilQsc  | RIEIPTLFIRDITRL    | 2            |
| NspA/Opa | NspA1 | RGFYVQADAAHAKAS   | NspA1sc | DFARYAAHAKQVSAG    | 2            |
| BamA     | BamA1 | GPMKFSYAYPLKKKPE  | BamA1sc | SKPKLGAKYPMPEFYK   | 2            |
| NspA     | NspA2 | RINDLRFVDYTRYK    | NspA2sc | AVRDLTYRDNKIYRF    | 2            |

## Clinical Trial Protocol

**KWTRP**  
**CLINICAL TRIAL PROTOCOL**

**Use of Bexsero immunisation to detect cross reactive antigens and anti-gonococcal  
antibodies in key populations in Kenya**

**1. GENERAL INFORMATION**

|                                                          |                                                                                         |
|----------------------------------------------------------|-----------------------------------------------------------------------------------------|
| <b>Protocol Number:</b>                                  | <b>CSC 182</b>                                                                          |
| <b>Trial Registration Number:</b>                        | ClinicalTrials.gov ID: NCT04297436                                                      |
| <b>Investigational Product(s):</b>                       | 4CMenB vaccine (Bexsero®)                                                               |
| <b>Funder:</b>                                           | <b>Wellcome Trust,</b><br>215 Euston Road<br>London NW1 2BE, UK                         |
| <b>Tel:</b>                                              | +44 2076 118888                                                                         |
| <b>Email:</b>                                            | s.towers@wellcome.ac.uk                                                                 |
| <b>Sponsor:</b>                                          | <b>University of Oxford</b><br>University Offices, Wellington Square, Oxford OX1<br>2JD |
| <b>Tel:</b>                                              | +44 1865 572245                                                                         |
| <b>Email:</b>                                            | ctrng@admin.ox.ac.uk                                                                    |
| <b>Sponsor's authorized representative /investigator</b> | Prof. Eduard Sanders<br>PO Box 239, Kilifi 80108                                        |
| <b>Tel:</b>                                              | +254723593-762                                                                          |
| <b>Email:</b>                                            | ESanders@kemri-wellcome.org                                                             |
| <b>Study monitor:</b>                                    | KWTRP- Clinical Trials Facility                                                         |
| <b>Email:</b>                                            | MMunene@kemri-wellcome.org                                                              |
| <b>Statistician:</b>                                     | Benedict Orindi<br>PO Box 239, Kilifi 80108                                             |
| <b>Email:</b>                                            | Borindi@kemri-wellcome.org                                                              |
| <b>Central Laboratory:</b>                               | KEMRI-Wellcome Trust Research lab's                                                     |
| <b>Tel:</b>                                              | +254 709 983000                                                                         |
| <b>Email:</b>                                            | info@kemri-wellcome.org                                                                 |
| <b>Drug/Product Manufacturer:</b>                        | 4CMenB vaccine (Bexsero® -GSK)<br>980 Great West Road, Brentford<br>Middlesex, TW8 9GS  |
| <b>Tel:</b>                                              | Tel: +44 20 8047 5000                                                                   |
| <b>Email:</b>                                            | customercontactuk@gsk.com                                                               |

CONFIDENTIAL

Version 1.4 dated 6 November 2020

8

**Confidentiality Statement**

9 The information contained herein is privileged or confidential and may not be disclosed unless such disclosure is  
10 required by applicable laws or regulations. In any event, persons to whom the information is disclosed must be  
11 informed that the information is privileged or confidential and may not be further disclosed by them. These  
12 restrictions on disclosure will apply equally to all future information supplied to you, which is indicated as  
13 privileged or confidential. This confidentiality statement also applies to data generated during the course of the  
14 study.

15

**SPONSOR'S APPROVAL OF THE PROTOCOL**

17

**Use of Bexsero immunisation to detect cross reactive antigens and anti-gonococcal antibodies in key**

18

**populations in Kenya**

19

**Protocol Number:**

20

21 The following personnel have reviewed and approved this protocol **Bexsero trial in key populations**, version  
22 number 1.3, and date:



Signature:

Dr. Rebecca Bryant, Research Ethics Manager

Date

OxTREC

23

24

**INVESTIGATOR'S APPROVAL OF THE PROTOCOL**

25

26

**Use of Bexsero immunisation to detect cross reactive antigens and anti-gonococcal antibodies in key**

27

**populations in Kenya**

28

**Protocol Number: CS 182**

29 The undersigned acknowledge possession of and have read the Investigators' Brochure, Edition x, month year,  
30 and protocol **Bexsero trial in key populations** version 1.4 dated 6 November 2020. Having fully considered all  
31 the information available, the undersigned consider that it is ethically justifiable to give 4CMenB vaccine  
32 (Bexsero®) to selected participants according to the agreed protocol.

33 I understand that all information concerning 4CMenB vaccine (Bexsero®) supplied to me by University of  
34 Oxford and/or its agents in connection with this study and not previously published is confidential information.

35 This includes the Investigators' Brochure, Clinical Trial Protocol, Case Report Forms and any other preclinical

CONFIDENTIAL

Version 1.4 dated 6 November 2020

36 and clinical data provided by University of Oxford. I understand that no data are to be made public or published  
37 without prior knowledge and written approval by University of Oxford.

38 By my signature below, I hereby attest that I have read, understood and agreed to abide by all the conditions,  
39 instructions and restrictions contained in Protocol **Bexsero trial in key populations** version 1.4 dated 6  
40 November 2020 and in accordance with the most recent Declaration of Helsinki and Good Clinical Practice and  
41 all applicable regulatory requirements.

42 I acknowledge that the Sponsor of the study University of Oxford has the right to discontinue the study at any  
43 time.

44 

6 November 2020

---

**Chief Investigator Signature****Date**

Prof. Christoph Tang, Professor of Pathology,  
Chief investigator, Gonococcal Vaccine Initiative



6 November 2020

---

**Principal Investigator Signature****Date**

Prof. Eduard Sanders, principal investigator

## 45 Table of Contents

|    |                                                                                    |    |
|----|------------------------------------------------------------------------------------|----|
| 46 | 1. GENERAL INFORMATION .....                                                       | 1  |
| 47 | <b>GLOSSARY OF TERMS AND ABBREVIATIONS:</b> .....                                  | 6  |
| 48 | 2. LAY SUMMARY .....                                                               | 7  |
| 49 | 3. LIST OF INVESTIGATORS.....                                                      | 8  |
| 50 | 4. ABSTRACT.....                                                                   | 9  |
| 51 | 5. INTRODUCTION .....                                                              | 9  |
| 52 | 5.1. Background Information.....                                                   | 9  |
| 53 | 5.2. Name and description of the investigational product(s).....                   | 13 |
| 54 | 5.3. Justification .....                                                           | 14 |
| 55 | 6. TRIAL OBJECTIVES AND PURPOSE.....                                               | 14 |
| 56 | 6.1. Null hypothesis .....                                                         | 15 |
| 57 | 7. TRIAL DESIGN.....                                                               | 15 |
| 58 | 7.1. Overall Study Design and Plan Description .....                               | 15 |
| 59 | 7.1.1. Recruitment .....                                                           | 16 |
| 60 | 7.1.2. Screening.....                                                              | 17 |
| 61 | 7.1.3. Enrolment .....                                                             | 17 |
| 62 | 7.1.4. Unscheduled (interim) Visits .....                                          | 18 |
| 63 | 7.1.5. End of Treatment Visitt .....                                               | 18 |
| 64 | 7.1.6. Follow-up Visit(s).....                                                     | 19 |
| 65 | 7.1.7. Study Restrictions .....                                                    | 19 |
| 66 | 7.2. Choice of Control Groups .....                                                | 20 |
| 67 | 8. SELECTION AND WITHDRAWAL OF STUDY PARTICIPANTS.....                             | 20 |
| 68 | 8.1. Description of the population to be studied .....                             | 21 |
| 69 | 8.2. Inclusion criteria .....                                                      | 21 |
| 70 | 8.3. Exclusion criteria .....                                                      | 21 |
| 71 | 8.4. Withdrawal criteria .....                                                     | 21 |
| 72 | 8.5. Managing withdrawals .....                                                    | 22 |
| 73 | 8.6. Replacing withdrawn participants .....                                        | 22 |
| 74 | 9. TREATMENT OF STUDY PARTICIPANTS .....                                           | 22 |
| 75 | 9.1. Treatments.....                                                               | 22 |
| 76 | Identity of Investigational Product (IP) .....                                     | 22 |
| 77 | 9.2. Storage .....                                                                 | 23 |
| 78 | 9.3. Dose Selection .....                                                          | 23 |
| 79 | 9.4. Timing of Doses .....                                                         | 23 |
| 80 | 9.5. Randomisation and Blinding.....                                               | 23 |
| 81 | 9.6 Packaging and Labelling.....                                                   | 23 |
| 82 | 9.7. Dispensing Procedures.....                                                    | 23 |
| 83 | 9.8. Dose Administration .....                                                     | 23 |
| 84 | 9.9. Accountability .....                                                          | 23 |
| 85 | 9.10.Unblinding .....                                                              | 23 |
| 86 | 9.11.Treatment Compliance .....                                                    | 23 |
| 87 | 9.12. Overdosage .....                                                             | 23 |
| 88 | 9.13.Prior/Concomitant Therapy.....                                                | 23 |
| 89 | 9.13.1. Prohibited Medication .....                                                | 23 |
| 90 | 9.13.2. Rescue Medication .....                                                    | 23 |
| 91 | 10. ASSESSMENT OF IMMUNOGENICITY.....                                              | 23 |
| 92 | 10.1 Identify Ng cross-reactive, human immune responses elicited by Bexsero®:..... | 24 |
| 93 | 10.3 Determining Th1 proliferation.....                                            | 24 |
| 94 | Antibody Responses.....                                                            | 25 |
| 95 | Sample storage:.....                                                               | 26 |
| 96 | 10.7. Drug concentration measurements .....                                        | 26 |
| 97 | 10.8. Health economic measures .....                                               | 27 |
| 98 | 11. ASSESSMENT OF SAFETY .....                                                     | 27 |

|     |                                                                            |    |
|-----|----------------------------------------------------------------------------|----|
| 99  | <b>11.1. Adverse Events (AEs)</b> .....                                    | 27 |
| 100 | <b>11.2. Definitions and monitoring of AEs</b> .....                       | 27 |
| 101 | <b>11.3. Causality</b> .....                                               | 28 |
| 102 | <b>11.4. Procedures for Recording Adverse Events</b> .....                 | 29 |
| 103 | <b>Documenting AEs</b> .....                                               | 29 |
| 104 | <b>Reporting Serious Adverse Events (SAEs) and/or Unexpected AEs</b> ..... | 29 |
| 105 | <b>11.5. Emergency Procedures</b> .....                                    | 31 |
| 106 | <b>11.3. Pregnancy</b> .....                                               | 31 |
| 107 | <b>12. STATISTICS</b> .....                                                | 31 |
| 108 | <b>12.1. Determination of sample size</b> .....                            | 31 |
| 109 | <b>12.2. Statistical and analytical plans</b> .....                        | 32 |
| 110 | <b>13. Access to Data</b> .....                                            | 32 |
| 111 | <b>14. Data Recording and Record Keeping</b> .....                         | 33 |
| 112 | <b>15. Data entry at study site</b> .....                                  | 33 |
| 113 | <b>15.1.1. Planned statistical methods</b> .....                           | 33 |
| 114 | <b>16. DIRECT ACCESS TO SOURCE DATA/DOCUMENTS</b> .....                    | 34 |
| 115 | <b>17. QUALITY CONTROL AND QUALITY ASSURANCE</b> .....                     | 34 |
| 116 | <b>17.1. Choice of investigators</b> .....                                 | 35 |
| 117 | <b>17.2. Monitors and monitoring plan</b> .....                            | 35 |
| 118 | <b>18. INTELLECTUAL PROPERTY</b> .....                                     | 36 |
| 119 | <b>19. TIME FRAME/DURATION OF THE TRIAL</b> .....                          | 37 |
| 120 | <b>20. ETHICS</b> .....                                                    | 37 |
| 121 | <b>20.1. Human Subjects</b> .....                                          | 37 |
| 122 | <b>20.2. Community Considerations</b> .....                                | 39 |
| 123 | <b>20.3. Informed Consent</b> .....                                        | 40 |
| 124 | <b>20.4. Compensation</b> .....                                            | 40 |
| 125 | <b>20.5. Patient Data Protection/Confidentiality</b> .....                 | 40 |
| 126 | <b>20.6. Data Sharing</b> .....                                            | 40 |
| 127 | <b>20.7. Safety</b> .....                                                  | 41 |
| 128 | <b>20.8. Material Transfer Agreement (if applicable)</b> .....             | 41 |
| 129 | <b>21. ARCHIVING AND RECORD RETENTION</b> .....                            | 42 |
| 130 | <b>22. FINANCING AND INSURANCE</b> .....                                   | 42 |
| 131 | <b>22.1. Budget</b> .....                                                  | 42 |
| 132 | <b>22.2. Insurance</b> .....                                               | 43 |
| 133 | <b>23. TRIAL MANAGEMENT</b> .....                                          | 44 |
| 134 | <b>24. REPORTING, DISSEMINATION AND NOTIFICATION OF RESULTS</b> .....      | 44 |
| 135 | <b>25. APPENDICES</b> .....                                                | 45 |
| 136 | <b>25.1. Roles of Investigators</b> .....                                  | 45 |
| 137 | <b>REFERENCES</b> .....                                                    | 45 |
| 138 |                                                                            |    |
| 139 |                                                                            |    |
| 140 |                                                                            |    |
| 141 |                                                                            |    |
| 142 |                                                                            |    |
| 143 |                                                                            |    |
| 144 |                                                                            |    |
| 145 |                                                                            |    |
| 146 |                                                                            |    |
| 147 |                                                                            |    |
| 148 |                                                                            |    |
| 149 |                                                                            |    |
| 150 |                                                                            |    |
| 151 |                                                                            |    |



152 **GLOSSARY OF TERMS AND ABBREVIATIONS:**

153

|     |           |                                            |
|-----|-----------|--------------------------------------------|
| 154 | AMR       | antimicrobial resistance                   |
| 155 | ART       | anti-retroviral therapy                    |
| 156 | CRF       | Case record form                           |
| 157 | CDC       | Centers for Disease Control and Prevention |
| 158 | C4BP      | C4 binding protein                         |
| 159 | CT        | Chlamydia trachomatis                      |
| 160 | fH        | factor H                                   |
| 161 | fHbp      | Factor H binding protein                   |
| 162 | FSW       | Female sex workers                         |
| 163 | Gc        | Gonococcal                                 |
| 164 | HBV       | Hepatitis B virus                          |
| 165 | iOMP      | integral outer membrane protein            |
| 166 | LGBT      | Lesbian Gay Bisexual Transgender           |
| 167 | MenB      | Meningococcal B                            |
| 168 | MSW       | Male sex workers                           |
| 169 | MSM       | men who have sex with men                  |
| 170 | NadA      | Neisseria adhesin A                        |
| 171 | Ng        | Neisseria gonorrhoeae                      |
| 172 | NHBA      | Neisserial Heparin binding antigen         |
| 173 | Nm        | Neisseria meningitidis                     |
| 174 | OMV       | outer membrane vesicles                    |
| 175 | POC       | point-of-care                              |
| 176 | PorA P1.4 | Porin A                                    |
| 177 | PrEP      | Pre-exposure Prophylaxis                   |
| 178 | RmpM      | reduction-modifiable protein M             |
| 179 | STI       | sexually transmitted infections            |
| 180 | Th1       | T helper cell 1                            |
| 181 | WHO       | World Health Organization                  |

182

183

184

185

186

187

188 **2. LAY SUMMARY**

189 **Formal Title** Use of Bexsero immunization to detect cross-reactive antigens and anti-gonococcal  
190 antibodies in key populations in Kenya

191 **Lay Title** Gonococcal vaccine study in key populations in Kenya

192 **What is the problem/background?** Gonorrhoea is a sexually transmitted infection that can  
193 infect both men and women. It can cause infections in the genitals, rectum, and throat. It  
194 is a very common infection, especially among young people aged 18-25 years.

195 Meningococcal disease and gonorrhoea are caused by bacteria that are closely related but  
196 cause different diseases that are spread in different ways. New evidence suggests that the  
197 Meningococcal B vaccine (Bexsero®) licensed outside of Kenya against meningococcal B  
198 disease may also be effective against gonorrhoea due to genetic similarities between the  
199 two organisms causing the two diseases. The aim of this study is to generate data to  
200 develop a gonorrhoea vaccine, using an existing vaccine against meningococcal disease.

201

202 **What questions are we trying to answer?**

203 To assess if immunisation of individuals at risk for gonococcal infection with 4CMenB  
204 (Bexsero®) will enhance an immune response against *Neisseria gonorrhoeae*.

205

206 **Where is the study taking place, how many people does it involve and how are they selected?**

207 Approximately 50, young adults (aged 18 - 25 years old) who are enrolled in the KEMRI cohort  
208 studies (known as Open B, Three-site, N, or Sue; including HIV-uninfected and infected  
209 individuals) in the KEMRI clinic in Mtwapa or Malindi will be able to participate in this study.  
210 The study will take place at the KEMRI clinic in the Malindi sub-county hospital.

211

212 **What does the study involve for those who are in it?**

213 Participants will make five study visits, including a screening visit, an enrolment visit and 3  
214 follow up visits. We will offer vaccination with the Meningococcal B vaccine (Bexsero®) vaccine  
215 at the enrolment visit and approximately 2 months later. We will use socio-demographic and risk  
216 behavior data collected under the KEMRI cohort studies. For participants living with HIV, we will  
217 collect a screening sample (1 tea spoon) and confirm that their viral load < 200 copies/ml. We will  
218 collect a 24 ml blood sample (2 ½ table spoons) at enrolment, and a 70 ml blood sample (7 table  
219 spoons) following the second vaccination. At study completion (month 6), we will collect a 4ml (1  
220 tea spoon) blood sample. We will collect a throat swab, a urine sample (for men), vaginal swab,  
221 and an anal swab at the enrolment, month 3 and month 6 visit to test for Chlamydiae and  
222 Gonorrhoea infection.

223 **What are the benefits and risks/costs of the study for those involved?** In this study, the  
 224 Meningococcal B vaccine (Bexsero®) is safe and is well tolerated, with over 17 million doses  
 225 already given worldwide. There is the possibility of common side effects that are mild and may  
 226 include a mild fever, soreness at the injection site, headache and generally feeling unwell for 1-2  
 227 days, similar to some other vaccines. As with all vaccines there is the possibility of rare and more  
 228 serious reactions such as an allergic/ anaphylactic reaction to the vaccine.

229

230 For participants there are no direct benefits, as they will receive the same research services as in  
 231 the KEMRI cohorts that they participate in already. Meningococcal B vaccine (Bexsero®)  
 232 prevents only against the meningococcal B strain which is common in Europe, Australia, and the  
 233 Unites States.

234

235 **How will the study benefit society?** Researchers hope to gain new insights on how the  
 236 Meningococcal B vaccine (Bexsero®) can be improved upon to make a vaccine against  
 237 gonorrhoeae. There is currently no vaccine available against *N. gonorrhoeae*.

238

239 **When does the study start and finish?**

240 This study is anticipated to start in the fourth quarter of 2020 (or early 2021), following ethical  
 241 and regulatory approvals. Participants will be involved in the study for 6 months. The sample and  
 242 data analysis will continue for 1-2 years and a report will be disseminated in 2022.

243

### 244 3. LIST OF INVESTIGATORS

245

|                          |                        |                      |
|--------------------------|------------------------|----------------------|
| 246 Prof. Christoph Tang | Chief investigator     | University of Oxford |
| 247 Prof. Eduard Sanders | Principal investigator | KEMRI-WTRP           |
| 248 Prof. Philip Bejon   | co-investigator        | KEMRI-WTRP           |
| 249 Dr. Eunice Nduati    | co-investigator        | KEMRI-WTRP           |
| 250 Dr. Clara Agutu      | co-investigator        | KEMRI-WTRP           |
| 251 Dr. Susan Graham     | co-investigator        | KEMRI-WTRP/ UW       |

252

253

254

255

256

257

258

259

**260 4. ABSTRACT**

261 Meningococcal disease and gonorrhoea are caused by bacteria that are closely related but cause different  
262 diseases that are spread in different ways. New evidence suggests that the Meningococcal B vaccine  
263 (Bexsero®) licensed outside of Kenya against meningococcal B disease may also be effective against  
264 gonorrhoea due to genetic similarities between the two organisms causing the two diseases. We will  
265 conduct a clinical trial of the Meningococcal B vaccine (Bexsero®) in approximately 50 male and  
266 female participants aged 18-25 years who are in follow up in KEMRI cohorts (including HIV-  
267 uninfected and infected individuals) at the KEMRI clinic in Mtwapa or Malindi. This is not an efficacy  
268 trial. Instead, we will assess if immunisation of individuals at risk for gonococcal infection with  
269 4CMenB (Bexsero®) elicits humoral and T cell cross-reactive responses against *Neisseria gonorrhoeae*  
270 (Ng). Participants will make five study visits, including a screening visit, an enrolment visit and 3 follow  
271 up visits. We will offer vaccination with the Meningococcal B vaccine (Bexsero®) vaccine at the  
272 enrolment visit and approximately 2 months later. We will collect a 20ml blood sample at enrolment,  
273 and a 70ml blood sample following the second vaccination. At study completion (month 6), we will  
274 collect a 4ml blood sample. We will collect a throat swab, a urine sample (for men), vaginal swab, and  
275 an anal swab at the enrolment, month 3 and month 6 visit to test for *Chlamydiae* and *Gonorrhoea*  
276 infection. Total study participation for participants is 6 months. Upon study completion, participants  
277 will continue to receive research care at the KEMRI clinic in the Mtwapa-area and Malindi.

278

**279 5. INTRODUCTION****280 5.1. Background Information**

281 Infection with *Neisseria gonorrhoeae* (Ng) remains a major public health problem worldwide <sup>[1]</sup>. The  
282 bacterium is a leading cause of sexually transmitted infections (STI), and responsible for mucosal  
283 infection, cases of pelvic inflammatory disease <sup>[2]</sup>, and chronic, asymptomatic infection <sup>[3]</sup>. Ng has a  
284 significant adverse impact on reproductive health (through ectopic pregnancy, infertility, prostatitis),  
285 while infection during birth can result in neonatal blindness <sup>[3]</sup>. Furthermore, Ng is an important risk  
286 factor for HIV acquisition, associated with a 4.6 fold increased risk <sup>[4]</sup>. There are over 300,000 cases of

287 Gonococcal (Gc) infection in the USA per annum, and the number of cases has risen dramatically in  
288 England (14,985 in 2008 to 42,4420 in 2017, [https://www.gov.uk/government/statistics/sexually-](https://www.gov.uk/government/statistics/sexually-transmitted-infections-stis-annual-data-tables)  
289 [transmitted-infections-stis-annual-data-tables](https://www.gov.uk/government/statistics/sexually-transmitted-infections-stis-annual-data-tables)), while the highest rates are in countries where  
290 diagnostic facilities and treatment are limited <sup>[5]</sup>.

291 The relentless rise of antimicrobial resistance (AMR) in Ng, with resistance developing soon after  
292 antibiotics are introduced <sup>[6]</sup>, poses challenges for effective therapy <sup>[7]</sup>. Furthermore, the emergence  
293 and spread of Ng strains which are resistant to azithromycin and ceftriaxone jeopardise control based  
294 on contact tracing and treatment of asymptomatic carriers <sup>[3]</sup>. Consequently, there is an urgent need to  
295 develop novel approaches to tackle Gc infection.

296

297 Historically, vaccines have proven remarkably effective in protecting individuals from infectious  
298 diseases, and can interrupt AMR spread, evident from the effect of conjugate capsular vaccines on  
299 *Streptococcus pneumoniae* <sup>[8]</sup>.

300

301 There has been remarkably little progress in Ng vaccine development, even with recent advances in  
302 vaccine development against the closely related *Neisseria meningitidis* (Nm). The stumbling blocks  
303 for vaccines against Ng have been well documented: i) there is little evidence of immunity following  
304 natural infection<sup>[9]</sup>, as the bacterium suppresses immune responses<sup>[10, 11]</sup>; ii) there are no known  
305 correlates of protection; iii) clinical trials with Gc killed whole-cell preparations offered no protection  
306 <sup>[12]</sup>, while vaccines based on the pilin of Type IV pili, a major Gc adhesin were undermined by the  
307 emergence of strains expressing variant pilins in immunised volunteers <sup>[13]</sup>, highlighting iv) difficulties  
308 in vaccine development with this variable pathogen.

309

310 However, technical advances and understanding of Ng immunity and pathogenesis provide strategies  
311 towards Gc vaccine development with prospects for success. Ng and Nm recruit the negative regulator  
312 of complement, factor H (fH)<sup>[14, 15]</sup>. Ng binds fH via PorB, the most abundant integral outer membrane  
313 protein (iOMP). There are two main variants of PorB, PI.A and PI.B, with the 5th extracellular loop of

314 PI.A engaging fH<sup>[14]</sup>; this is enhanced by sialylation of bacterial lipopolysaccharide<sup>[16]</sup>. PI.A and PI.B  
315 PorB loops also bind to C4 binding protein (C4BP), further subverting complement<sup>[17]</sup>. Furthermore,  
316 PorB is delivered to phagocytes in outer membrane vesicles (OMVs), causing apoptosis<sup>[18]</sup>, potentially  
317 preventing antigen presentation. Additionally, antibodies against PIII (homologue of Nm RmpM)  
318 subvert responses against other surface antigens<sup>[19, 20]</sup>.

319 OMV vaccines have been successfully deployed against clonal outbreaks of Nm. Nm epidemics  
320 have been controlled by OMV vaccines in Cuba, Norway, and most recently New Zealand <sup>[21]</sup>.

321 We will employ OMV-based approaches against Ng. Immunisation with Nm OMVs was associated  
322 with protection against Ng. An Nm outbreak in New Zealand led to vaccination with MeNZB, an  
323 OMV vaccine from the causative isolate NZ98/254. A recent case-controlled study estimated  
324 MeNZB effectiveness against Ng as 31% (C.I. 21-39) <sup>[22]</sup>. The basis of this cross-protection is  
325 assumed to be similarity of Ng and Nm surface proteins. OMVs from NZ98/254 are a key  
326 constituent of Bexsero®, licensed Nm vaccine given in the UK<sup>[23]</sup>. Therefore, we exploit Bexsero®  
327 as an immunological probe to identify Ng antigens by cross-reactive responses in individuals with  
328 high Gc exposure as recurrent exposure to Ng may elicit some immunologic memory <sup>[24]</sup>.

329

330 A recent study assessed cross reactivity to Ng of serum raised to the 4CMenB vaccine (Bexsero®),  
331 which contains the MeNZB OMV component plus three recombinant antigens (NadA, fHBP-  
332 GNA2091, and NHBA-GNA1030).<sup>[25]</sup> It was shown that a high level of sequence identity exists  
333 between MeNZB OMV and Bexsero OMV antigens, and gonococcal proteins. NHBA is the only  
334 4CMenB vaccine (Bexsero®) recombinant antigen that is conserved and surfaced exposed in Ng.  
335 4CMenB vaccine (Bexsero®) induces antibodies in humans that recognise gonococcal proteins.<sup>[25]</sup>

336 The goal of this study is to define the immune responses to Bexsero® in individuals (HIV uninfected  
337 and infected) who are at risk and are likely to have been exposed previously to *N. gonorrhoeae*. This  
338 is with the overall aim of generating a vaccine against *N. gonorrhoeae* by identifying cross-reactive

339 antigens elicited by the meningococcal vaccine Bexsero® that might confer protection against  
340 gonococcal infection. In this way, we will be exploiting a vaccine that has already been licensed in the  
341 UK and the US for use in our target population. Therefore this is not an efficacy study, and we will not  
342 require a control group with non-immunised subjects.

343

#### 344 Description of the population to be studied

345 Trial participants will be recruited from a KEMRI-cohort of mostly male and female sex workers  
346 (MSW; FSW) in Mtwapa and Malindi, which represents an at-risk, core population for STI transmission.  
347 Our incidence estimates for Ng (based on Xpert testing) in HIV-negative 18-25 year-old MSM  
348 participants is 21.4 per 100 person-years (95% CI: 13.1-35.0), and 43.5 per 100 person-years (95% CI:  
349 23.4-80.8) in HIV-infected individuals (unpublished). At present, the KEMRI cohort in Mtwapa follows  
350 125 MSM aged 18-25 years (100 HIV-1 negative, and 25 HIV-1 positive), and 9 FSW (5 HIV-1  
351 negative-, and 4 HIV-1 positive). There is no Ng incidence estimates available for women. Therefore,  
352 this cohort is subject to high Ng exposure, so study participants are likelier to develop responses against  
353 Ng than the general population [24].

354

#### 355 Summary of the known and potential risks and benefits, if any, to human participants

356 *Potential Benefit to Participants:* Vaccine recipients will have no direct benefit of receiving 4CMenB  
357 vaccine (Bexsero®) as Meningococcal B (MenB) disease is uncommon in Kenya. Participants will  
358 benefit from point-of-care (POC)X-pert sexually transmitted infections (STI) screening and treatment  
359 of infections as most STI are asymptomatic. All participants in the KEMRI cohort studies benefit from  
360 regular risk reduction counselling, HIV testing (when HIV negative), hepatitis B virus (HBV)  
361 vaccination, pre-exposure prophylaxis (PrEP) (if participants indicate that they wish to be on PrEP),  
362 and antiretroviral therapy (ART).

363

364 *Potential Risk to Participants:*

365 **1.** Collection of oropharyngeal and anal swabs for STI screening. Collection of swabs can be  
366 uncomfortable, but should cause minimal distress to participants. **2.** Vaccination.

367 The most common reported side effect in adolescents and young adults following vaccination with  
368 4CMenB (Bexsero®) is pain at the injection site, headache, and generally feeling unwell. Other  
369 possible side effects include fever, feelings of tiredness and nausea [26].

370

371 As with all vaccines, there is a small chance of an allergic reaction to the vaccine including a severe  
372 allergic reaction, or anaphylaxis (risk less than 1 in a million doses for existing vaccine) [27].

373

374 **5.2. Name and description of the investigational product(s),**

375 4CMenB vaccine (Bexsero®) was licensed in 2013 in Europe and North America and in various other  
376 jurisdictions. 4CMenB vaccine (Bexsero®) is an FDA-approved vaccine to prevent invasive disease  
377 caused by *Neisseria meningitidis* serogroup B. It is approved for use in individuals 10 through 25  
378 years of age. During clinical development, the vaccine was evaluated in adolescents, and it was  
379 demonstrated that two doses of 4CMenB vaccine (Bexsero®) induced robust immune responses  
380 against the vaccine antigens [26,28]. The vaccine was well tolerated, and no safety concerns were  
381 identified (reviewed in [29]).

382

383 Route of administration, dosage, dosage regimen, and vaccination period

384 4CMenB vaccine (Bexsero®; 0.5mL). The vaccine is given by deep intramuscular injection, in the  
385 deltoid muscle region of the upper arm, twice and approximately two months apart. Each dose of  
386 vaccine contains recombinant *Neisseria meningitidis* group B NHBA fusion protein (50 micrograms);  
387 recombinant *Neisseria meningitidis* group B NadA protein (50 micrograms); recombinant *Neisseria*  
388 *meningitidis* group B fHbp fusion protein (50 micrograms) and Outer membrane vesicles (OMV) from  
389 *Neisseria meningitidis* group B strain NZ98/254 (25 micrograms measured as amount of total protein  
390 containing the PorA P1.4) adsorbed on aluminium hydroxide (0.5 mg Al3+).

391



### 392 **5.3. Justification**

393 *Neisseria gonorrhoeae* (Ng) is a leading cause of sexually transmitted infections (STI) worldwide,  
394 responsible for >70 million cases annually <sup>[30]</sup>. The emergence of antimicrobial resistance (AMR) has  
395 made combatting Ng a priority for the WHO and CDC. Difficulties treating Ng adversely impacts  
396 female reproductive and foeto-maternal health, while gonococcal (Gc) infection is an important  
397 cofactor for HIV transmission <sup>[31]</sup>. Furthermore, control of Gc transmission is based on contact tracing  
398 and treatment, and threatened by AMR <sup>[32]</sup>.

399

400 While vaccines are a valuable approach to combat AMR, Gc vaccine research has been hampered by  
401 limited/lack of protective immunity following infection, no correlates of protection, variation of Ng,  
402 and past vaccine failures.

403

404 However, recent advances have provided fresh impetus for vaccine development. Our collaborators  
405 will validate effective candidate antigens for inclusion in a Gc vaccine through pre-clinical evaluation,  
406 work that falls outside of this protocol. Our study will assess immune responses in highly exposed  
407 individuals before and after vaccination with Meningococcal B vaccine (Bexsero®). Previously,  
408 Plummer et al showed that female sex workers with repeated NG infection in Nairobi had specific but  
409 incomplete protection against subsequent infection with the homologous serovar.<sup>[24]</sup> For this reason,  
410 we will enroll highly exposed individuals from Kenya. Specifically, we aim to identify Ng cross-  
411 reactive, human immune responses elicited by 4CMenB vaccine (Bexsero®): We will perform a  
412 clinical trial of Bexsero®, a licensed vaccine outside of Kenya containing *Neisseria meningitidis* (Nm)  
413 OMVs, in a well characterised, at-risk cohort of sex workers in Kenya. We do not intend to evaluate  
414 the protective efficacy of 4CMenB vaccine (Bexsero®). Instead we will exploit 4CMenB vaccine  
415 (Bexsero®) as an immunologic probe to identify antigens that elicit humoral and T cell cross-reactive  
416 responses against Ng, which will inform vaccine design.

417

### 418 **6. TRIAL OBJECTIVES AND PURPOSE**

419 **6.1. Null hypothesis.** This is an explorative study using 4CMenB vaccine (Bexsero®). Therefore, a  
420 null hypothesis will not be tested.

421 **6.2 Primary objective** –To assess if immunisation of individuals at risk for gonococcal infection with  
422 4CMenB (Bexsero) elicits humoral and T cell cross-reactive responses against Ng.

423

424 **Explorative objective** – To assess if immunisation of individuals at risk for gonococcal infection with  
425 4CMenB (Bexsero) differs between HIV negative and positive participants.

426 We will exploit Bexsero as an immunological probe to identify antigens that elicit humoral cross-  
427 reactive responses against Ng. We will examine IgG reactivity against these Ng proteins in  
428 microarrays with sera from Bexsero vaccinated individuals with high Ng exposure.

429 Comparison of the pre/post immunization sera will provide a comprehensive overview of Bexsero  
430 antigens which induce Ng-cross reactive IgG responses and could therefore be responsible for Nm  
431 OMV-mediated protection against Ng. This approach is likely to be more informative than comparing  
432 results between control and immunized subjects, as individuals' exposure and responses to Ng are  
433 likely to differ. We will also explore if immune responses differ between HIV-negative and positive  
434 participants. Screening will be performed on plasma taken at enrolment, approximately 2 weeks post  
435 first immunization, approximately 2 weeks post second immunization and at 6 months.

436

## 437 7. TRIAL DESIGN

### 438 7.1. Overall Study Design and Plan Description

439

440 This study will be an open-label single-arm clinical trial with a 4CMenB vaccine (Bexsero®), licensed  
441 in over 40 countries. The study will take place at the KEMRI-clinic in Malindi which has provided  
442 HIV prevention and care services to key populations since 2010. Prospective participants will be  
443 invited from existing prevention and care cohort studies. Therefore, all participants will be in regular  
444 (3-monthly) follow up, have received hepatitis B vaccination, receive HIV testing (if HIV negative),  
445 and adherence counselling for PrEP or ART, as appropriate. The KEMRI clinic is supported by a

446 community engagement programme, and new studies will be discussed with a key population

447 community advisory board, and other stake holders.

448

449 Trial participants will be aged 18-25 years, be available for follow up for six months, and not participate

450 in any other vaccine study. A course of Bexsero® vaccinations requires a minimum interval of one

451 month. Participants will be immunised twice at an interval of two months to allow for maturation of

452 immune responses. Participants will be screened for Chlamydia trachomatis (Ct) and Ng in

453 urine/vaginal, rectal and oropharyngeal secretions at enrolment, month 3, and month 6 (study

454 completion), and receive treatment when a CT/Ng infection is detected. We will collect approximately

455 6 ml at study screening (for participants living with HIV only), 20 ml blood at enrolment, 70 ml of blood

456 two weeks after the second vaccination, and 4 ml at study completion.

457

458 Table 1: Study Schedule

459

|                                                         | <b>Visit 1<br/>Screening</b> | <b>Visit 2<br/>Enrolment</b> | <b>Visit 3<br/>Follow-up</b> | <b>Visit 4<br/>Follow-up</b> | <b>Visit 5<br/>Follow-up</b> |
|---------------------------------------------------------|------------------------------|------------------------------|------------------------------|------------------------------|------------------------------|
| <b>Study week</b>                                       | <b>-2</b>                    | <b>0</b>                     | <b>8</b>                     | <b>10</b>                    | <b>24</b>                    |
| <b>Assessment /<br/>Procedure</b>                       |                              |                              |                              |                              |                              |
| Informed Consent                                        | x                            |                              |                              |                              |                              |
| Demography                                              | x                            |                              |                              |                              |                              |
| Medical history                                         | x                            |                              |                              |                              |                              |
| Symptom directed<br>physical examination                |                              | x                            |                              | x                            | x                            |
| Urine (pregnancy<br>test)                               |                              | x                            | x                            |                              |                              |
| Vaccination                                             |                              | x                            | x                            |                              |                              |
| Blood /swab<br>collection for lab<br>assays and storage | x                            | x                            |                              | x                            | x                            |

460

#### 461 **7.1.1. Recruitment**

462 Healthy adult male and female volunteers, aged 18-25 years, participating in ongoing KEMRI cohorts

463 (SSC 894, SSC1224, SERU 3520, SERU 3788) at the Mtwapa or Malindi clinics will be eligible for

464 study screening. The KEMRI cohorts SSC No. 894 and SERU 3788 follows HIV negative at-risk  
465 participants who are in three-monthly follow up, and receive risk reduction counselling, PrEP, and  
466 treatment for symptomatic STI's. KEMRI cohort SERU No. 3520 and SSC 1224 follows HIV-positive  
467 participants in monthly and three-monthly follow up, respectively, who receive risk reduction  
468 counselling, ART, and treatment for symptomatic STI's. HIV-positive participants who are adherent  
469 to ART and virally suppressed (i.e. viral load < 200 copies per ml) are considered healthy.

470

471 We will aim to enroll both HIV-negative and positive participants, mostly male and female sex  
472 workers, and target participants for whom Ng was detected by Xpert CT/NG testing during their  
473 previous KEMRI visits. At present, over 100 HIV-negative participants (100 MSM, 5 FSW), and 29  
474 HIV-positive participants (25 MSM and 4 FSW) aged 18-25 years are eligible for screening.

475

476 Prior to study screening, participants will be invited to an information session at the KEMRI clinic and  
477 their interest in study participation assessed.

478

#### 479 **7.1.2.Screening**

480 Screening assessments will be performed up to 14 days before enrolment. Screening procedures will  
481 only be performed after the volunteer's written consent has been obtained. Before providing informed  
482 consent, prospective volunteers will receive a study screening number and be screened for study  
483 eligibility. Demographic, risk behaviour and medical history information will be obtained from  
484 existing protocol databases. For participants living with HIV, a 6 ml sample will be collected to  
485 confirm that the viral load < 200 copies per ml to be eligible for screening.

486

#### 487 **7.1.3.Enrolment**

488 All eligible participants will receive a vaccination at their enrolment visit.

489 Prior to the first vaccination, site personnel will:

- 490 • Review any questions the volunteer may have about the study
- 491 • Review the Informed Consent Document with the volunteer

- 492 • Review screening safety laboratory data (i.e. pregnancy screen)
- 493 • Review interim medical history
- 494 • Assess baseline vital signs (i.e. axillary temperature)
- 495 • Perform a symptom directed physical examination
- 496 • Collect specimens for all tests as indicated in the Schedule of Procedures Appendix A,
- 497 including CT/NG testing of oropharyngeal and anal swabs, and urine.
- 498 • Administer the 4CMenB vaccine (Bexsero®) according to instructions in the Study
- 499 Operations Manual.
- 500 • Observe volunteer closely for at least 30 minutes after vaccine/investigational medicinal
- 501 product administration for any acute (reactogenicity/solicited adverse reactogenicity
- 502 /solicited adverse reactions).
- 503 • Assess any other adverse events

#### 504 **7.1.4. Unscheduled (interim) Visits**

505 Visits / contacts other than those described in the Schedule of Procedures (Appendix A) will be  
506 classified as unscheduled or interim visits and recorded on applicable source documents. They may  
507 occur:

- 508 • For administrative reasons e.g. the volunteer may have questions for the study staff or may need
- 509 to re-schedule a follow up visit.
- 510 • To review a laboratory investigation from a previous visit
- 511 • To review the outcome of an adverse event.
- 512 • To conduct a study visit where a volunteer has missed the scheduled study visit window.
- 513 • For any other reason requested by the volunteer or Principal Investigator.

514

515 **7.1.5. End of Treatment Visit.** Participants will have a second vaccination scheduled

516 approximately two months after enrolment at which the first vaccination has been given

517 (schedule of Procedures -Appendix A)

518 Prior to the second vaccination, site personnel will:

- 519 • Review any questions the volunteer may have about the study
- 520 • Review the Informed Consent Document with the volunteer
- 521 • Review screening safety laboratory data and perform a pregnancy test
- 522 • Review interim medical history
- 523 • Assess baseline vital signs (i.e. axillary temperature)
- 524 • Perform a symptom directed physical examination
- 525 • Collect specimens for all tests as indicated in the Schedule of Procedures Appendix A
- 526 • Administer the 4CMenB vaccine (Bexsero®) according to instructions in the Study
- 527 Operations Manual.
- 528 • Observe volunteer closely for at least 30 minutes after vaccine/investigational medicinal
- 529 product administration for any acute (reactogenicity/solicited adverse reactogenicity
- 530 /solicited adverse reactions).
- 531 • Assess any other adverse events.

532

533 **7.1.6. Follow-up Visit(s).** One follow up visit is scheduled approximately two weeks following  
534 receipt of the final 4CMenB vaccine (Bexsero®) according to the schedule of procedures,  
535 for blood collection and immunogenicity assessments, and a final follow up visit is  
536 scheduled 24 weeks post enrolment for CT/NG testing of oropharyngeal and anal swabs,  
537 and urine, and immunogenicity assessments. Upon detection of any CT/NG infection,  
538 participants will be contacted to receive treatment. Upon detection of any Xpert NG  
539 infection, swabs will be collected from the infected site for Ng culture and drug sensitivity  
540 testing.

541

#### 542 **7.1.7. Study Restrictions**

543 Each participant has the right to withdraw from the trial at any time.

544 If a participant withdraws consent for the whole study, no further study procedures should take  
545 place. In some circumstances, participants will withdraw consent for specific procedures, or fail  
546 to attend a visit, but may still be willing to participate in subsequent visit/ procedure.

547 In this situation the following guidelines apply:

- 548 • If any of the procedures at the enrolment visit are refused then they will be considered as  
549 withdrawn from the study, and no further procedures will take place.
- 550 • If a participant refuses or doesn't attend for the 2nd immunisation, they can remain in the  
551 study for the final CT/NG swab and urine and immunogenicity blood collection, and  
552 should be encouraged to do so.

553 In addition, the Investigator may discontinue a participant from the trial at any time if the  
554 Investigator considers it necessary for any reason including:

- 555 • An adverse event which requires discontinuation of the trial medication or results in  
556 inability to continue to comply with trial procedures
- 557 • Withdrawal of Consent (as above)
- 558 • Loss to follow up, but we will still include any data already gathered from the participant  
559 in the final analysis, unless consent is withdrawn.
- 560 • Exclusion from the trial will not result in exclusion of the data already taken for that  
561 participant.
- 562 • The reason for withdrawal will be recorded in the case record form (CRF).
- 563 • If the participant is withdrawn due to an adverse event, the Investigator will arrange for  
564 follow-up visits or telephone calls until the adverse event has resolved or stabilised.
- 565 • Withdrawn participants will not be replaced.
- 566 • **Patient Obligations.** Participants are expected to complete all 5 study visits, and report any  
567 adverse event to the investigators.

## 568 7.2. Choice of Control Groups

569 *n/a.*

## 570 8. SELECTION AND WITHDRAWAL OF STUDY PARTICIPANTS

**571 8.1. Description of the population to be studied**

572 We will enroll up to 50 participants, including approximately 35 HIV-uninfected and 15 HIV-1  
573 infected male and female sex workers from ongoing KEMRI observational studies.

574

**575 8.2. Inclusion criteria**

- 576 • Healthy male and female as assessed by a medical history, physical exam, and laboratory  
577 tests. HIV-positive participants who are adherent to ART and virally suppressed (viral  
578 load <200 copies per ml) are considered healthy.
- 579 • At least 18 years of age on the day of screening and will not reach 26th birthday on the  
580 day of the second vaccination (approximately 6 weeks after enrolment)
- 581 • Willing and able to give informed consent for participation in the trial before any study-  
582 related procedures are performed.
- 583 • Willing to donate blood samples for immunogenicity assessments.

584

**585 8.3. Exclusion criteria**

- 586 • Any clinically significant acute or chronic medical condition that is considered  
587 progressive that, in the opinion of the Principal Investigator or designee, makes the  
588 volunteer unsuitable for participation in the trial
- 589 • Pregnancy
- 590 • Participation in another clinical trial (i.e. investigational HIV vaccine candidate),  
591 within the previous 3 months or expected participation during the study
- 592 • Bleeding disorder diagnosed by a physician (e.g., factor deficiency, coagulopathy or  
593 platelet disorder that requires special precautions).
- 594 • History of severe local or systemic reactogenicity to vaccines (e.g., anaphylaxis,  
595 respiratory difficulty, angioedema).

596

**597 8.4. Withdrawal criteria**

598 The Final Visit or Early Termination Visit procedures will be performed according to the  
599 Schedule of Procedures (Appendix A). Participant retention strategies and procedures are aimed



600 to achieve a study retention of >90%. Participants may voluntarily withdraw from the study at  
601 any time and for any reason. Participants may be withdrawn from the study permanently if:

- 602 • The principal investigator(s) or designee has reason to believe that a participant is  
603 not complying with the study or study procedures.
- 604 • The sponsor or local regulatory authorities decide to stop or cancel the study.
- 605 • Participant is lost to follow up.

606  
607

#### 608 **8.5. Managing withdrawals**

- 609 • If a participant withdraws from the study, the date and reasons for study withdrawal  
610 (if available) will be recorded in the volunteer's source documents and study records  
611 and stored samples will be retained unless consent is withdrawn.

#### 612 **8.6. Replacing withdrawn participants**

613 This is not an efficacy trial, but an observational study of immune responses to a licensed vaccine.  
614 We will not replace any participant should any participant withdraw, as our sample will  
615 oversample up to 10% of participants.

616

### 617 **9. TREATMENT OF STUDY PARTICIPANTS**

#### 618 **9.1. Treatments**

619 4CMenB vaccine (Bexsero® -GSK) 0.5mL intra-muscularly; two doses administered 2 months  
620 apart. Each dose of vaccine contains recombinant *Neisseria meningitidis* group B NHBA fusion  
621 protein (50 micrograms); recombinant *Neisseria meningitidis* group B NadA protein (50  
622 micrograms); recombinant *Neisseria meningitidis* group B FHbp fusion protein (50 micrograms)  
623 and Outer membrane vesicles (OMV) from *Neisseria meningitidis* group B strain NZ98/254 (25  
624 micrograms measured as amount of total protein containing the PorA P1.4) adsorbed on  
625 aluminium hydroxide (0.5 mg Al<sub>3+</sub>).

626 The vaccine will be administered into the deltoid muscle of the non-dominant arm.

#### 627 **Identity of Investigational Product (IP)**

CONFIDENTIAL

Version 1.4 dated 6 November 2020

628 4CMenB vaccine (Bexsero® -GSK) - Bexsero suspension for injection in pre-filled syringe. The  
629 manufacturer will be requested to label the vaccine as an investigational product for clinical trial  
630 use only.

### 631 **9.2. Storage**

632 Supply of 4CMenB will be through GSK, UK. The vaccine will be stored in 2–8 degree Celsius  
633 fridges at KEMRI clinic study pharmacy. The fridge will be temperature monitored.

### 634 **9.3. Dose Selection**

635 There are no planned dose modifications.

636

### 637 **9.4. Timing of Doses**

638 *n/a.*

### 639 **9.5. Randomisation and Blinding.** *n/a.*

640 **9.6 Packaging and Labelling.** Bexsero® (GSK vaccine) will be packaged and labelled by the  
641 manufacturer. We will ensure that the vaccine will be labelled as an investigational product for  
642 clinical trial use only.

643 **9.7. Dispensing Procedures.** Dispensing procedures will be described in the study operational  
644 manual (SOM).

645 **9.8. Dose Administration.** Vaccine will be provided in a pre-filled syringe.

### 646 **9.9. Accountability**

647 4CMenB vaccine (Bexsero® -GSK) will be ordered through GSK. Investigational medical  
648 product (IMP) will be administered according to the protocol. No additional labelling of IMPs is  
649 required.

### 650 **9.10. Unblinding.** *n/a.*

### 651 **9.11. Treatment Compliance**

652 Participants are expected to complete all 5 study visits, including a screening visit, 2 vaccination  
653 visits, a 2-week post vaccination visit, and an end of study visit.

### 654 **9.12. Overdosage** *n/a.*

655 **9.13. Prior/Concomitant Therapy** There are no concomitant medications that would result in  
656 exclusion from this trial, therefore we will not be recording them.

657 **9.13.1. Prohibited Medication.** *n/a.*

658 **9.13.2. Rescue Medication.** *n/a.*

## 659 **10. ASSESSMENT OF IMMUNOGENICITY**

660 **10.1 Identify Ng cross-reactive, human immune responses elicited by Bexsero®:**

661 We will exploit Bexsero as an immunological probe to identify antigens that elicit humoral cross-  
662 reactive responses against Ng. Our collaborators have analysed the OMV proteome of Bexsero and  
663 have constructed protein microarrays containing 91 *Nm* proteins. We will examine IgG reactivity  
664 against these *Nm* proteins in microarrays with sera from Bexsero vaccinated individuals with high Ng  
665 exposure at a collaborative laboratory at the University of Manchester.

666 Comparison of the pre/post immunization sera will provide a comprehensive overview of Bexsero  
667 antigens which induce Ng-cross reactive IgG responses and could therefore be responsible for *Nm*  
668 OMV-mediated protection against Ng. Screening will be performed on plasma taken at enrolment,  
669 approximately 2 weeks post second immunization and at 6 months time point. The screening will take  
670 place at three sites, KEMRI –CGMRC, the University of Oxford, and a collaborators lab at the  
671 Uniformed Services University in the USA. Antigens and/or microarrays will be sent to KEMRI-  
672 CGMRC where printing on slides and running of the microarray will be performed. Microarrays will  
673 also be done by Jeremy Derrick at University of Manchester. Samples with cross-reactive antibodies  
674 against the OMV antigens, which may offer protection against Ng will be selected to inform antigen  
675 choice and vaccine design.

676 **10.2 Determining systemic antibody levels and subclass analysis**

677 Serum antigen- and OMV-specific IgG1, IgG2a, Ig3A and IgA titres will be determined by ELISA  
678 approximately two weeks after final immunizations. Responses will be compared among pre-post test  
679 groups by repeated measures ANOVA.<sup>[33]</sup>

680

681 **10.3 Determining Th1 proliferation**

682 Currently all candidate vaccines that show efficacy in the mouse models against Ng (2C7 peptide  
683 mimetic, Gc OMVs administered with IL-12) induce Th1 responses compared to over 10 other Gc  
684 antigens that were tested with Th2-inducing adjuvants and were not protective. T cell responses will  
685 be measured in two ways:

686 Indirect responses: by determining the IgG1/IgG2 ratios after immunization. Ig subclass levels  
687 (including IgG1/IgG2a ratios) will be indicative of Th1 responses.

688 Direct responses: PBMCs will be isolated at enrolment, , and 2 weeks post second immunization and  
689 used for the detection of antigen-specific IFN $\gamma$  secreting T cells. A panel of overlapping peptides that  
690 cover the entire length of the immunogen will be used. To maximize cell use, IL-2 and IFN $\gamma$  will be  
691 simultaneously detected using a dual-colour ELISpot assay. The presence of these cytokines after  
692 antigen specific stimulation will be indicative of the Th1 response. Additionally, we will assess T cell  
693 polyfunctionality and the induction of immunological memory and homing patterns by intracellular  
694 cytokine staining and surface staining by flow cytometry. KWTRP has a 17 colour flow cytometry  
695 allowing extensive phenotypic characterization.

696 Detailed epitope mapping studies are also planned again using flow cytometry to more fully examine  
697 the depth of vaccine induced T cell responses. Th1 proliferations will be assessed by Ann Jerse  
698 Uniformed Services University, Bethesda, Maryland, USA.

### 699 **Antibody Responses**

700 The induction of antibody will be measured by a standard endpoint ELISA assay using peptides covering  
701 recombinant protein antigens, purified antigens, and defined OMVs. The protein antigens will be  
702 generated during the fabrication of protein microarrays, and as candidate vaccines. Antigens will be  
703 coated onto microtiter plates, and circulating antibody responses in sera detected by incubating serial  
704 dilutions of sera with antigens; binding of total IgG, IgA, and IgG subclasses will be determined using  
705 specific secondary antibodies. Antibody titres from individuals approximately two weeks following the  
706 final immunisation and/or infected individuals will be compared with levels measured at study entry,  
707 and statistical significance analysed by unpaired T tests.

708 After the final immunization, PBMCs will be collected for isolation of antigen-specific memory B  
709 cells. B-cell sorting will require a blood draw of 50 ml (appendix A: schedule of procedures). The aim  
710 of this will be to generate human monoclonal antibodies (mAbs) against key vaccine candidates;  
711 these mAbs will be a valuable resource during the development and evaluation of vaccine  
712 candidates. Generated monoclonal antibodies will be characterized and testing for effector  
713 function. Specifically, in those participants where cross-reactive plasma will be identified in  
714 section 10.1, antigen-specific memory B cells will be isolated two weeks post second  
715 immunization.

716 The immunoglobulin genes will be independently amplified and the variable gene regions  
717 cloned into expression vectors. Monoclonal antibodies will then be expressed and purified.  
718 These monoclonal antibodies will be characterized and tested for their binding capacity against  
719 Ng antigens. This work will be done at KEMRI-CGMRC where similar studies are currently on  
720 going. We will select samples for isolating antigen-specific cells based on individuals' responses  
721 as judged by results using immune sera with protein microarrays and ELISA.

#### 722 **Sample storage:**

723 PBMC, serum and plasma samples will be stored as indicated in the Laboratory Analytical Plan (LAP)  
724 at laboratories at KEMRI-WTRP- (Kilifi, Kenya), Universities of Oxford, and Manchester (UK), and  
725 Uniformed Services University (USA) and analysed for the purposes outlined within this protocol as  
726 listed above. Consent will be sought for long-term storage at KEMRI-WTRP in Kenya, any future usage  
727 of these samples will seek the necessary approvals from CGMRC and KEMRI-SERU. Samples not  
728 consented for long-term storage are to be stored until study close out and thereafter disposed of  
729 following the local country requirements and regulations relating to the disposal of biological research  
730 samples.

731

#### 732 **10.7. Drug concentration measurements**

733 *n/a*734 **10.8. Health economic measures**735 *n/a*

736

737 **11. ASSESSMENT OF SAFETY**738 **11.1. Adverse Events (AEs)**

739 This study is being conducted with a licensed product in other countries than Kenya (and  
 740 administered using the same dose and regimen as in countries where it is licensed), and as such  
 741 safety monitoring will therefore focus on detecting any suspected, unexpected, serious, adverse  
 742 reactions, i.e. SUSARs. We will monitor for solicited adverse events.

743 **11.2. Definitions and monitoring of AEs**

|                             |                                                                                                                                                                                                                                                                                                                                                                                                                                                                                                                                                                                                           |
|-----------------------------|-----------------------------------------------------------------------------------------------------------------------------------------------------------------------------------------------------------------------------------------------------------------------------------------------------------------------------------------------------------------------------------------------------------------------------------------------------------------------------------------------------------------------------------------------------------------------------------------------------------|
| Adverse event (AE)          | Any untoward medical occurrence in a participant to whom a medicinal product has been administered, including occurrences which are not necessarily caused by or related to that product.                                                                                                                                                                                                                                                                                                                                                                                                                 |
| Adverse reaction (AR)       | <p>An untoward and unintended response in a participant to an investigational medicinal product which is related to any dose administered to that participant.</p> <p>The phrase "response to an investigational medicinal product" means that a causal relationship between a trial medication and an AE is at least a reasonable possibility, i.e. the relationship cannot be ruled out.</p> <p>All cases judged by either the reporting medically qualified professional or the Sponsor as having a reasonable suspected causal relationship to the trial medication qualify as adverse reactions.</p> |
| Serious Adverse Event (SAE) | <p>A serious adverse event is any untoward medical occurrence that:</p> <ul style="list-style-type: none"> <li>• results in death</li> <li>• is life-threatening</li> <li>• requires inpatient hospitalisation or prolongation of existing hospitalisation</li> <li>• results in persistent or significant disability/incapacity</li> </ul>                                                                                                                                                                                                                                                               |

|                                                       |                                                                                                                                                                                                                                                                                                                                                                                                                                                                                                                                                            |
|-------------------------------------------------------|------------------------------------------------------------------------------------------------------------------------------------------------------------------------------------------------------------------------------------------------------------------------------------------------------------------------------------------------------------------------------------------------------------------------------------------------------------------------------------------------------------------------------------------------------------|
|                                                       | <ul style="list-style-type: none"> <li>• consists of a congenital anomaly or birth defect.</li> </ul> <p>Other ‘important medical events’ may also be considered serious if they jeopardise the participant or require an intervention to prevent one of the above consequences.</p> <p>NOTE: The term "life-threatening" in the definition of "serious" refers to an event in which the participant was at risk of death at the time of the event; it does not refer to an event which hypothetically might have caused death if it were more severe.</p> |
| Serious Adverse Reaction (SAR)                        | An adverse event that is both serious and, in the opinion of the reporting Investigator, believed with reasonable probability to be due to one of the trial treatments, based on the information provided.                                                                                                                                                                                                                                                                                                                                                 |
| Suspected Unexpected Serious Adverse Reaction (SUSAR) | <p>A serious adverse reaction, the nature and severity of which is not consistent with the information about the medicinal product in question set out:</p> <ul style="list-style-type: none"> <li>• in the case of a product with a marketing authorisation, in the summary of product characteristics (SmPC) for that product</li> <li>• in the case of any other investigational medicinal product, in the investigator’s brochure (IB) relating to the trial in question.</li> </ul>                                                                   |

744

745 NB: to avoid confusion or misunderstanding of the difference between the terms “serious” and

746 “severe”, the following note of clarification is provided: “Severe” is often used to describe intensity of

747 a specific event, which may be of relatively minor medical significance. “Seriousness” is the

748 regulatory definition supplied above.

749

750 **11.3. Causality**

751 The relationship of relevant serious adverse events to the trial medication must be determined by a

752 medically qualified individual according to the following definitions:

753 **Related:** The adverse event follows a reasonable temporal sequence from trial medication  
 754 administration. It cannot reasonably be attributed to any other cause.

755 **Not Related:** The adverse event is probably produced by the participant's clinical state or by other  
 756 modes of therapy administered to the participant.

757 For the purpose of expedited safety reporting, all possibly, probably or definitely related AEs are  
 758 considered Investigational Medicinal Product-related AEs.

759 Details on AE definitions are provided below and in the SOM.

| RELATIONSHIP | DESCRIPTION                                                                                                                                                                                                                                                                                                                      |
|--------------|----------------------------------------------------------------------------------------------------------------------------------------------------------------------------------------------------------------------------------------------------------------------------------------------------------------------------------|
| Unrelated    | There is no evidence of any causal relationship                                                                                                                                                                                                                                                                                  |
| Unlikely     | There is little evidence to suggest that there is a causal relationship (for example, the event did not occur within a reasonable time after administration of the trial vaccination). There is another reasonable explanation for the event (for example, the patient's clinical condition, other concomitant treatment).       |
| Possible     | There is some evidence to suggest a causal relationship (for example, because the event occurs within a reasonable time after administration of the trial vaccination). However, the influence of other factors may have contributed to the event (for example, the patient's clinical condition, other concomitant treatments). |
| Probable     | There is evidence to suggest a causal relationship and the influence of other factors is unlikely.                                                                                                                                                                                                                               |
| Definitely   | There is clear evidence to suggest a causal relationship and other possible contributing factors can be ruled out.                                                                                                                                                                                                               |

760

761

#### 762 **11.4. Procedures for Recording Adverse Events**

763

##### 764 **Documenting AEs**

765 AEs are observed by the Investigator or reported by the volunteer, will be recorded on the CRF,  
 766 whether or not attributed to trial vaccination.

767 The following information will be recorded: description, date of onset and end date, severity, whether

768 or not it is a serious adverse event, assessment of relatedness to investigational medicinal products and

769 whether treatment was required. Follow-up information should be provided as necessary.

##### 770 **Reporting Serious Adverse Events (SAEs) and/or Unexpected AEs**



771 Should investigators become aware of a serious adverse event the following information will be  
772 recorded: description, date of onset and end date, severity, assessment of relatedness to trial  
773 medication, other suspect drug or device and action taken. Follow-up information should be provided  
774 as necessary.

775 The severity of events will be assessed on the following scale: 1 = mild, 2 = moderate, 3 = severe.

776 SAEs considered related to the trial medication as judged by a medically qualified investigator or the  
777 Sponsor will be followed either until resolution, or the event is considered stable.

778 It will be left to the Investigator's clinical judgment to decide whether or not an AE is of sufficient  
779 severity to prevent the participant receiving a second dose of vaccine. A participant may also  
780 voluntarily withdraw from treatment due to what he or she perceives as an intolerable AE. If either of  
781 these occurs, the participant will be given appropriate care under medical supervision until symptoms  
782 cease, or the condition becomes stable, and may participate in immunogenicity assessments according  
783 to schedule.

784

#### 785 Reporting of SAEs

786

787 The period of recording SAEs will be from the time of taking informed consent to the last study visit  
788 for that participant.

789 All SAEs must be reported on the SAE reporting form to SERU within 24 hours of the Site Study  
790 Team becoming aware of the event, with the site Principal Investigator being included in this  
791 correspondence.

792 All SAE information must be recorded on an SAE form and faxed, or scanned and emailed, to SERU.

793 Additional and further requested information (follow-up or corrections to the original case) will be  
794 detailed on a new SAE Report Form and faxed/emailed to SERU.

795

796 All SUSARs will be reported by the Principal investigator to the relevant Regulatory Authority and to  
797 the Ethics Committees and other parties as applicable. For fatal and life-threatening SUSARS, this

798 will be done no later than seven calendar days after the Sponsor or delegate is first aware of the  
799 reaction or following timelines required in the individual countries, whichever one is more stringent.  
800 Any additional relevant information will be reported within 8 calendar days of the initial report. All  
801 other SUSARs will be reported within 15 calendar days.

802

### 803 *DSMB*

804 An independent Data Safety and Monitoring Board (DSMB) will be set up consisting of qualified  
805 volunteers with the necessary knowledge of clinical trials. The DSMB will receive summary reports,  
806 prior to each meeting. All data reviewed by the DSMB will be in the strictest confidence. A DSMB  
807 charter will outline its responsibilities, number of interim reports and how it will operate. Interim  
808 reports will be prepared by the Trial data manager.

809 All DSMB recommendations will be communicated to the PI. The PI will be responsible for  
810 submitting the written DSMB summary reports with recommendations as applicable to local/ national  
811 ethics committees and other applicable groups.

### 812 **11.5. Emergency Procedures**

813 The KEMRI clinic in Malindi has an emergency trolley and staff is trained to offer emergency  
814 procedures should anaphylactic shock arise following vaccination.

815

### 816 **11.3. Pregnancy**

817 Any pregnancy which occurs during the clinical trial, and the outcome of the pregnancy, should be  
818 recorded and followed up for congenital abnormality or birth defect, at which point it would fall  
819 within the definition of “serious”.

820 **Procedures for reporting any protocol violation(s).** Protocol violation (s) will be reported promptly to  
821 the Ethics Committee and Regulatory Authority.

822

823

## 824 **12. STATISTICS**

### 825 **12.1. Determination of sample size**

826

827 The sample size is based on our experience of evaluating the humoral responses to Bexsero® in 50  
828 healthy individuals from the UK with a low likelihood of previous exposure to Ng. In that study, we  
829 would not expect the vaccine to elicit memory responses, and considered the previous group as naïve.  
830 We assessed immune responses using protein microarrays which contain over 80 purified recombinant  
831 antigens that are present in the OMVs from the vaccine. This allowed us to detect IgG responses  
832 against a diverse array of antigens. We identified six antigens using the Nm microarrays which  
833 exhibited significant enhancement following vaccination in sera from these volunteers.  
834 In the present study, we plan to enroll around twice the number of subjects from our cohort of sex  
835 workers who have high rates of exposure to Ng, and so are more likely to mount a serological and/or  
836 cellular response to the vaccine than the general population. This should provide sufficient lead  
837 candidate antigens for vaccine development, including recombinant proteins and/or engineering  
838 OMVs.

839

## 840 **12.2. Statistical and analytical plans**

841 We will use protein microarrays to identify antigens in *Neisseria gonorrhoeae* which are recognised by  
842 antibodies elicited by Bexsero. We have pioneered the development and use of protein microarrays,  
843 which enable the detection of cross-reactive antibody responses against multiple antigens in parallel.  
844 We have generated protein microarrays consisting of membrane/surface proteins of *N. meningitidis*, and  
845 evaluated responses in 50 healthy volunteers immunised with an OMV-based vaccine. <sup>[33]</sup> More than  
846 80% of participants displayed significant serological responses detected by the microarrays, with around  
847 10 antigens identified by responses in most individuals. We predict that we will observe similar  
848 responses to Bexsero (which contains an OMV) in our study population which is highly exposed to Ng  
849 infection so might be immunologically primed, with a high degree of sequence conservation (>90%  
850 identify) between Ng and meningococcal antigens. Therefore, we have chosen to use a similar number  
851 of volunteers for the current study as in our previous work.

## 852 **13. Access to Data**

853 Direct access will be granted to authorised representatives from the Sponsor, host institution and the  
854 regulatory authorities to permit trial-related monitoring, audits and inspections.

**855 14. Data Recording and Record Keeping**

856 Source documents are the documents where data are first recorded, and from which volunteers' CRF  
857 data are obtained. These include, but are not limited to, hospital records (from which medical history  
858 and previous and concurrent medication may be summarised into the CRF), clinical charts, and  
859 laboratory and pharmacy records.

860 CRF entries will be considered source data if the CRF is the site of the original recording (e.g. there is  
861 no other written or electronic record of data). All documents will be stored safely in confidential  
862 conditions. On all trial-specific documents, other than the signed consent, the volunteer will be referred  
863 to by the trial volunteer number/code, not by name.

864

865 All trial data will be entered in the clinical trial database, which are maintained through Standard  
866 Operating Procedures.

867 The volunteer will be identified by a unique trial specific number and/or code in any database. The  
868 name and any other identifying detail will NOT be included in any trial data electronic file.

**869 15. Data entry at study site**

870 The data collected at the site will be recorded onto the source documents by the study staff and  
871 entered into the clinical trial database.

**872 15.1.1. Planned statistical methods**

873 A detailed statistical analysis plan will be developed by prior to database lock and final analysis.

874 **Demographics and baseline characteristics.** We will collect demographics and baseline  
875 characteristics from existing databases (as participants derive from well-characterized cohort studies),  
876 including number of sexual partners in the past month, sexual role taking, sex work, and detection of  
877 any prior Gc infection, or Gc infection during the study. These data will be captured in the two existing  
878 KEMRI protocols in which participants will remain enrolled.

879 For the primary analysis, we will compare the difference in total IgG sero-reactivity between human  
880 pre-vaccination (week 0) and post-vaccination sera (week 10 and week 24). To determine the increase

881 in IgG reactivity for a particular antigen at week 10 or week 24, the value obtained from serum collected  
882 before immunization will be subtracted from the same value obtained from serum after immunization  
883 at week 10 or week 24. A two-tailed T-test will be used to calculate p-values and test for significance  
884 between doses per protein.

885 For the ELISPOT analysis, we will determine the proportion of IFN $\gamma$  secreting T cells per 1 million  
886 PBMCs in samples tested 10 weeks post vaccination (week 10). To account for background responses,  
887 spot forming units (SFUs) detected at baseline (week 0) samples prior to vaccination, and the average  
888 SFUs identified in wells with mock peptides (negative control; at week 0) will be subtracted from  
889 responses at week 10. The proportions antigen-specific IFN $\gamma$  secreting T cells will be compared using  
890 non-parametric tests between the different peptide pools used for stimulation, between vaccinees to  
891 identify the peptide pool yielding highest activation (pre-vaccination (week 0) and post-vaccination  
892 sera (week 10)), and between vaccinees with the highest T cell responses.

893

894 **Missing data.** There will be no imputation of missing data.

895 **15.1.1.1. Efficacy population** n/a

896 **15.1.1.2. Safety population** n/a

897 **15.1.1.3. Interim analysis** n/a

898 **15.1.1.4. Efficacy analyses** n/a

899 **15.1.1.5. Safety analyses** n/a

900 **15.1.1.6. Amendments to statistical analysis** n/a

901 **15.1.1.7. Stopping criteria for termination of trial** n/a

902

## 903 **16. DIRECT ACCESS TO SOURCE DATA/DOCUMENTS**

904 Direct access will be granted to authorised representatives from the Sponsor, host institution and the  
905 regulatory authorities to permit trial-related monitoring, audits and inspections. Ultimately any  
906 gonococcal genome sequence data deriving from any Ng isolates, without participant identifying  
907 information, will be made available publicly.

908

## 909 **17. QUALITY CONTROL AND QUALITY ASSURANCE**

910 To ensure the quality and reliability of the data collected and generated and the ethical conduct  
911 of this study, a Study Operations Manual will be developed. All deviations will be reported and  
912 investigated. The Study Operations Manual describes reporting and deviation documentation  
913 requirements and procedures. Regular monitoring will be performed according to ICH-GCP as  
914 indicated in Section 17.2. An independent audit of the study and study sites may be performed  
915 by the Sponsor or designee to establish the status of applicable quality systems. Inspection by  
916 regulatory authorities may also occur. By signing the protocol, the Principal Investigators agree  
917 to facilitate study related monitoring, audits, IEC/IRB review and regulatory inspection(s) and  
918 direct access to source documents. Such information will be treated as strictly confidential and  
919 under no circumstances be made publicly available.

920 **17.1. Choice of investigators.** Investigators in Kenya have extensive experience with key population  
921 cohort studies (from which participants for the Gc vaccine study will derive), as well as  
922 immunogenicity testing of vaccines at the KWTRP lab's in Kilifi. Collaborators in the UK (Chris  
923 Tang and Jeremy Derrick), and USA (Ann Jerse) are leading researchers in the Gc-field, and have  
924 extensive experience in the design, development, and post-implementation analysis of vaccine  
925 against the closely-related pathogen, *N. meningitidis*.

926

927 **17.2. Monitors and monitoring plan**

928 Study monitoring will be conducted by the KWTRP. Monitoring will be conducted to ensure  
929 that: the rights and wellbeing of volunteers are protected; the reported data are accurate,  
930 complete and verifiable from source documents; and that study conduct complies with the  
931 currently approved protocol, standard operating procedures, Good Clinical Practice (GCP) and  
932 other applicable regulatory requirements.

933 Study monitors will visit the study sites to review all trial documents including volunteer  
934 screening and enrolment logs, informed consent forms, source documents, CRFs, laboratory

CONFIDENTIAL

Version 1.4 dated 6 November 2020

935 and medical records. The specific objectives of a monitoring visit will be 1). to verify the  
936 existence of adequately signed informed consent forms for each enrolled volunteer; 2) to verify  
937 the prompt, complete and accurate recording of data, and prompt reporting of all SAEs and  
938 SUSARs; 3) to verify the quality and accuracy of data by validation of CRFs against the source  
939 documents such as volunteers' medical records, laboratory reports, and any other relevant  
940 original data; 4) to verify adequate IMP supply, storage, management, and accountability; and  
941 5) to ensure protection of study volunteers, and investigators' compliance with the protocol,  
942 regulatory requirements and applicable guidelines.

943 Study investigators and volunteers agree that the study monitor may review study facilities and  
944 source records, and observe the performance of study procedures. Additionally, study  
945 investigators will permit inspection or audit of the study facilities and all study-related records  
946 by relevant regulatory authorities, SERU, and/or representatives of the Sponsor. All  
947 information collected during monitoring or audit visits will be treated as strictly confidential  
948 and will under no circumstances be made publicly available.

949

## 950 **18. INTELLECTUAL PROPERTY**

951 Any intellectual property rights that arise from the work will be safeguarded according to the current  
952 KEMRI guidelines and the Industrial Property Act of 2001, sections 32, 58 and 80. The scientific and  
953 intellectual contributions of all persons involved in the research will be appropriately acknowledged in  
954 all publications and presentations arising from the work.

955

956

957

958

959

960

961

962 **19. TIME FRAME/DURATION OF THE TRIAL**

| Activity                                 | Q3-4, 2019 | Q1-2, 2020 | Q3-4, 2020 | 2021-22 |
|------------------------------------------|------------|------------|------------|---------|
| <b>Consortium meeting</b>                | ✓          |            |            |         |
| <b>Cohort preparations</b>               | ✓          | ✓          | ✓          |         |
| <b>Clinical Trial</b>                    |            |            | ✓ 1        | ✓       |
| <b>Clinical Immunology</b>               |            |            | ✓          | ✓       |
| <b>Dissemination &amp; communication</b> |            |            | ✓          | ✓       |

963 **1). Screening may start in December 2020**

964

965 **20. ETHICS**

966 Ethical approval will be sought from KEMRI Scientific & Ethics Review Unit (SERU), and the Oxford  
 967 Tropical Research Ethics Committee (OXTREC).

968

969 **20.1. Human Subjects**

970 The study involves human subjects and the principles below will be observed.

971 “First, do no harm.”

972 The study staff will make every effort to protect participants’ privacy and confidentiality.

973 However, it is possible that others may learn a participant is taking part in a study and make  
 974 assumptions about his health or sexuality. All participants are known by a number, we will not  
 975 include names or other identifying information on participants’ records. All study documents  
 976 will be stored on a password-protected computer only accessible by authorized staff.

977

978 Participation in this study is voluntary. Participants are free to decide if they want to take part  
 979 or not, which they will be informed about before obtaining consent. If participants do agree to  
 980 participate they can change their mind at any time without any consequences.

981



982 Participants will be recruited from four KEMRI cohorts studies (SERU No. 894, 3520, 3778  
983 and 1224) in Mtwapa or Malindi. The KEMRI cohort studies follow both HIV uninfected and  
984 infected individuals at-risk for Ng infection, including male and female sex workers, and MSM.  
985 For this study, we will screen participants aged 18-25 years. At present, over 100 HIV-negative  
986 participants (100 MSM, 5 FSW), and 29 HIV-positive participants (25 MSM and 4 FSW) aged 18-25  
987 years are eligible for screening.

988  
989 Prospective participants will be invited to attend an individual information session in which the  
990 purpose of the Gc vaccine study will be discussed, and questions can be asked.

991 We will ensure that participants understand all aspects of the study, including which samples  
992 will be collected (i.e. blood, and throat, vaginal/rectal swab samples, and urine) and what  
993 volumes will be collected.

994

995 We will explain that the aim of the study is to assess how the immune system responds to a  
996 licensed Meningococcal B vaccine (Bexsero®). Over 17 million doses of the vaccine have  
997 been given worldwide, but the vaccine is not licensed in Kenya (as meningococcal B infection  
998 is not common). Meningococcal B vaccine (Bexsero®) prevents only against the  
999 meningococcal B strain which is common in Europe, Australia, and the Unites States.

1000

1001 Due to genetic similarities between the two organisms causing gonorrhoea and  
1002 meningococcal B disease, the vaccination with Bexsero® may be effective against  
1003 gonorrhoea.

1004

1005 The KEMRI cohort studies in Mtwapa and Malindi are supported by a 'key populations  
1006 study' community advisory board (CAB). The CAB consists of stakeholders from LGBTQ-  
1007 organizations, business leaders, bar owners, religious leaders, community security, chiefs,

1008 police, village elders, as well as lawyers, human -rights activists, and leaders from several  
1009 LGBTQ CBOs along the Kenyan coast.

1010 The CAB is an integral part of KEMRI's HIV and STI engagements; building and fostering  
1011 partnerships between researchers and local study communities, helping to strengthen local  
1012 trust and mutual understanding of research issues; and ensuring that values and cultural  
1013 differences among participants are respected. KEMRI organises quarterly engagement  
1014 meetings with the CAB during which planned studies will be shared. The CAB will be  
1015 informed about the Gc-vaccine study, and we will ensure that CAB members can ask  
1016 questions about study. We will also inform Kilifi County Health Department, Malindi stake  
1017 holder's forum, and members of the Kilifi Community Representatives in ongoing quarterly  
1018 engagements.

1019  
1020 Prospective participants who consider participation in the Gc vaccine study may want to  
1021 consult CAB members. The CAB will also be informed about study progress, and when  
1022 summary data will become available from the study.

1023

## 1024 **20.2. Community Considerations**

1025

1026 While the study does not offer direct benefits (i.e. participants will receive the same research  
1027 services as in the KEMRI cohorts that they participate in already), researchers will get new  
1028 insights from immune responses to the Meningococcal B vaccine (Bexsero®) and if any  
1029 component of that vaccine can be improved upon in the future to make a better vaccine  
1030 against gonorrhoea.

1031 While the immunological analysis of the study will likely take up to two years before results  
1032 can be disseminated, our community dissemination plan will include updates on study start  
1033 and completion for participants, and share information with community stakeholders on any

1034 further information concerning ‘Bexsero vaccination studies’ that may be conducted  
1035 elsewhere.

1036

### 1037 **20.3. Informed Consent**

1038 Written informed consent will be obtained from all study participants by the research  
1039 counsellor. Informed consent document (ICD) will be available in English and Kiswahili.  
1040 During screening, we will provide information to prospective participants and summarise key  
1041 sections of the ICD. We will ensure sufficient time to provide information and allow for  
1042 questions. Counsellors and clinicians will adhere to standard operating procedures in obtaining  
1043 consent.

1044

### 1045 **20.4. Compensation**

1046 The Meningococcal B vaccine (Bexsero®), and study related tests and visits will be free of  
1047 charge. Participants will be given Ksh500 at the screening visit, and Ksh1000 at the 4 follow  
1048 up visits to cover the cost of transportation. The Ksh1000 per study visit for participation in a  
1049 vaccine study is similar to a previous vaccine study (Yellow Fever fractional doses) conducted  
1050 at the KEMRI clinic in Malindi during 2019-20, and to a planned HIV vaccine study to be  
1051 conducted in 2020. Participants who will travel from Mtwapa to Malindi will receive additional  
1052 travel compensation of public transport costs.

1053

### 1054 **20.5. Patient Data Protection/Confidentiality**

1055 Study information will be kept confidential by storing paper copies in locked cabinets and  
1056 electronic copies in password-protected computers that will be only accessible to study staff.  
1057 Identifying information will be destroyed after study completion according to KEMRI policy.

1058

### 1059 **20.6. Data Sharing**

1060 The knowledge gained from this research will be shared and published in summary form,  
1061 without revealing identity of participants. In future, information collected during this study may  
1062 be used to support new research by other researchers. In all cases, we will only share  
1063 information with other researchers in ways that do not reveal identity of participants. Any future  
1064 research must first be approved by a county or national expert committee to make sure that the  
1065 interests of participants and their communities are protected.

1066

1067 Publications from this study are required to comply with the Wellcome Trust Open Access  
1068 policy: [https://wellcome.ac.uk/funding/guidance/guidance-wellcome-trust-centres-and-major-](https://wellcome.ac.uk/funding/guidance/guidance-wellcome-trust-centres-and-major-overseas-programmes)  
1069 [overseas-programmes](https://wellcome.ac.uk/funding/guidance/guidance-wellcome-trust-centres-and-major-overseas-programmes), and the policy on data, software and materials management and  
1070 sharing: [https://wellcome.ac.uk/funding/guidance/policy-data-software-materials-](https://wellcome.ac.uk/funding/guidance/policy-data-software-materials-management-and-sharing)  
1071 [management-and-sharing](https://wellcome.ac.uk/funding/guidance/policy-data-software-materials-management-and-sharing).

1072 Upon completion of the study, participants will be invited for a study findings dissemination  
1073 session. We will also share study findings with the CAB.

1074

### 1075 **20.7. Safety**

1076 Upon completion of the Gonococcal vaccine study, participants may continue in the KEMRI  
1077 cohorts at the KEMRI clinic in Mtwapa or Malindi as appropriate.

1078

### 1079 **20.8. Material Transfer Agreement (if applicable)**

1080 The study will store samples at the KWTRP laboratories in Kilifi, and share a portion of the  
1081 samples with collaborators in the UK, and USA. Material transfer agreements with  
1082 collaborators in the UK, and USA will be made where appropriate, and specify shipment of  
1083 samples as described in the methods.

1084

1085

1086

1087 **21. ARCHIVING AND RECORD RETENTION**

1088 Electronic data bases and source documents will be stored for a minimum of 10 years and  
1089 follow programme policies on archiving and data storage.

1090

1091 **22. FINANCING AND INSURANCE**

1092 The study will be funded primarily by a collaborative grant from the Wellcome Trust.

1093 **22.1. Budget**

| Item                                  | US\$               | Ksh                   |
|---------------------------------------|--------------------|-----------------------|
| Staff                                 | 176000             | 17,600000             |
| Laboratory assays and cohort support  | 32750 <sup>1</sup> | 3,275000 <sup>1</sup> |
| Bexsero Vaccine, GSK, UK              | 12000              | 1,200000              |
| Immunology assays, including shipment | 39975              | 3,972500              |
| Meeting attendance                    | 5000               | 500000                |
| Total                                 | 265,725            | 26,572500             |

1094 1). Inclusive of up to 15 viral load assays.

1095

1096 **Budget justification**

1097 **Personnel.** Personnel includes support for a clinical officer, pharmacy technologist,  
1098 counsellors, data staff, community engagement staff, field workers, and house-keeping staff.

1099 **Laboratory assays, cohort support, and clinic visits** at the KEMRI clinic include X-pert  
1100 CT/NG testing (US\$ \$ 22.5 per assay; 3 anatomical sites per visit; 3 visits). Cohort support  
1101 includes community engagement activities, tracing, information session and community  
1102 advisory board training. **Clinic visits** include a screening visit (Ks500) and 4 follow up visits  
1103 (1000Ksh per visit).

1104 **Meningococcal B vaccine (Bexsero®) @ 120US\$ per dose (2 doses, 50 participants).**

1105 **Immunological assays.** Fresh T-cell Elispot, possible B-cell cloning and cell sorting on site;  
1106 shipment of cells, and serum to Oxford, Manchester (UK), and Bethesda, USA.

1107

1108

1109

1110 **22.2. Insurance**

1111

1112 The University of Oxford has a specialist insurance policy in place which would operate in the  
1113 event of any volunteer suffering harm as a result of their involvement in the research (Newline  
1114 Underwriting Management Ltd, at Lloyd's of London).

1115 **Indemnity**

1116 KWTRP have professional indemnity cover for KEMRI staff.

1117

1118 If any volunteer is harmed as a result of this trial, medical care will be provided. The sponsor  
1119 will provide care until complete cure or stabilization of a research related injury. The injured  
1120 research volunteer will be given the best care available within the country for the research  
1121 related injury. Research volunteers shall not be required to waive their legal rights for redress  
1122 in courts of law.

1123 *Negligent Harm*

1124 Indemnity and/or compensation for negligent harm arising specifically from an accidental  
1125 injury for which the University is legally liable as the Research Sponsor will be covered by the  
1126 University of Oxford.

1127 *Non-Negligent Harm*

1128 Indemnity and/or compensation for harm arising specifically from an accidental injury, and  
1129 occurring as a consequence of the Research volunteers' participation in the trial for which the  
1130 University is the Research Sponsor will be covered by the University of Oxford.

1131

1132

**1133 23. TRIAL MANAGEMENT**

1134 The trial will be registered through ClinicalTrials.gov. The Principal Investigator will be  
1135 responsible for all aspects of the study at the study site.

**1136 Study Supervision**

1137 The Principal Investigator will work closely with his/her study team to implement the study,  
1138 address issues in a timely manner, assure consistent documentation, and compile and provide  
1139 study progress reports to the medical monitor. Accrual and retention rates, safety of study  
1140 volunteers, and other relevant parameters will be closely monitored by the study team, Principal  
1141 Investigator, and Medical Monitor.

**1142 Investigator's Records**

1143 Study records include administrative documentation, including reports and correspondence  
1144 relating to the study, as well as documentation related to each volunteer screened for and/or  
1145 enrolled in the study (e.g., screening and enrolment logs, locator information forms, informed  
1146 consent forms, laboratory reports, case report forms, and all other source documents). The  
1147 Principal Investigator will maintain and store, in a secure manner, complete, accurate, and  
1148 current study records for a minimum of 2 years.

**1149 24. REPORTING, DISSEMINATION AND NOTIFICATION OF RESULTS**

1150 An initial descriptive manuscript on key population participation in a Bexsero trial in Kenya will be  
1151 prepared promptly after data analysis is completed using mutually accepted Publication Guidelines. A  
1152 primary manuscript assessing if immunisation of individuals at risk for gonococcal infection with  
1153 4CMenB (Bexsero) will elicit humoral and T cell cross-reactive responses against Ng immune responses  
1154 will be prepared when all available data is analysed. Authorship criteria will be based on  
1155 contributions to the design, work, analysis and writing of the study report. A summary of the

1156 main findings will be developed that will be in non-technical language and shared with stake  
1157 holders, and the CAB.

## 1158 25. APPENDICES

- 1159 1. Appendix A  
1160 2. CV of Prof Chris Tang  
1161 3. Ethics certificates of investigators  
1162

### 1163 25.1. Roles of Investigators

|                |                                                                                                                        |
|----------------|------------------------------------------------------------------------------------------------------------------------|
| Chris Tang     | Chief investigator Gonococcal Vaccine Initiative, study design                                                         |
| Eduard Sanders | clinical trial principal investigator, study design, study oversight<br>Bexsero trial, medically qualified and on-site |
| Philip Bejon   | Protocol development, study design, immunology study oversight                                                         |
| Clara Agutu    | Protocol development, clinical trial investigator, medically qualified and<br>on-site                                  |
| Eunice Nduati  | B-cell immunologist                                                                                                    |
| Susan Graham   | Protocol development, clinical trial investigator                                                                      |

1164

1165

## 1166 REFERENCES

1167

- 1168 1. DALYs GBD, Collaborators H, Murray CJ, Barber RM, Foreman KJ, Abbasoglu Ozgoren A, et al. **Global,**  
1169 **regional, and national disability-adjusted life years (DALYs) for 306 diseases and injuries and healthy life**  
1170 **expectancy (HALE) for 188 countries, 1990-2013: quantifying the epidemiological transition.** *Lancet* 2015;  
1171 386(10009):2145-2191.  
1172 2. Brunham RC, Gottlieb SL, Paavonen J. **Pelvic inflammatory disease.** *N Engl J Med* 2015; 372(21):2039-  
1173 2048.  
1174 3. Vincent LR, Jerse AE. **Biological feasibility and importance of a gonorrhea vaccine for global public**  
1175 **health.** *Vaccine* 2018.  
1176 4. Mlisana K, Naicker N, Werner L, Roberts L, van Loggenberg F, Baxter C, et al. **Symptomatic vaginal**  
1177 **discharge is a poor predictor of sexually transmitted infections and genital tract inflammation in high-risk**  
1178 **women in South Africa.** *J Infect Dis* 2012; 206(1):6-14.  
1179 5. Rowley J, Vander Hoorn S, Korenromp E, Low N, Unemo M, Abu-Raddad LJ, et al. **Chlamydia,**  
1180 **gonorrhoea, trichomoniasis and syphilis: global prevalence and incidence estimates, 2016.** *Bulletin of the*  
1181 *World Health Organization* 2019; 97(8):548-562P.  
1182 6. Unemo M, Bradshaw CS, Hocking JS, de Vries HJC, Francis SC, Mabey D, et al. **Sexually transmitted**  
1183 **infections: challenges ahead.** *Lancet Infect Dis* 2017; 17(8):e235-e279.  
1184 7. Wi T, Lahra MM, Ndowa F, Bala M, Dillon JR, Ramon-Pardo P, et al. **Antimicrobial resistance in Neisseria**  
1185 **gonorrhoeae: Global surveillance and a call for international collaborative action.** *PLoS Med* 2017;  
1186 14(7):e1002344.  
1187 8. Whitney CG, Farley MM, Hadler J, Harrison LH, Bennett NM, Lynfield R, et al. **Decline in invasive**  
1188 **pneumococcal disease after the introduction of protein-polysaccharide conjugate vaccine.** *N Engl J Med*  
1189 2003; 348(18):1737-1746.  
1190 9. Jerse AE, Bash MC, Russell MW. **Vaccines against gonorrhea: current status and future challenges.**  
1191 *Vaccine* 2014; 32(14):1579-1587.



CONFIDENTIAL

Version 1.4 dated 6 November 2020

- 1192 10. Liu Y, Islam EA, Jarvis GA, Gray-Owen SD, Russell MW. **Neisseria gonorrhoeae selectively suppresses**  
1193 **the development of Th1 and Th2 cells, and enhances Th17 cell responses, through TGF-beta-dependent**  
1194 **mechanisms.** *Mucosal immunology* 2012; 5(3):320-331.
- 1195 11. Liu Y, Liu W, Russell MW. **Suppression of host adaptive immune responses by Neisseria gonorrhoeae:**  
1196 **role of interleukin 10 and type 1 regulatory T cells.** *Mucosal immunology* 2014; 7(1):165-176.
- 1197 12. Greenberg L, Diena BB, Ashton FA, Wallace R, Kenny CP, Znamirovski R, et al. **Gonococcal vaccine**  
1198 **studies in Inuvik.** *Can J Public Health* 1974; 65(1):29-33.
- 1199 13. Boslego JW, Tramont EC, Chung RC, McChesney DG, Ciak J, Sadoff JC, et al. **Efficacy trial of a**  
1200 **parenteral gonococcal pilus vaccine in men.** *Vaccine* 1991; 9(3):154-162.
- 1201 14. Ram S, McQuillen DP, Gulati S, Elkins C, Pangburn MK, Rice PA. **Binding of complement factor H to**  
1202 **loop 5 of porin protein 1A: a molecular mechanism of serum resistance of nonsialylated Neisseria**  
1203 **gonorrhoeae.** *The Journal of experimental medicine* 1998; 188(4):671-680.
- 1204 15. Schneider MC, Prosser BE, Caesar JJ, Kugelberg E, Li S, Zhang Q, et al. **Neisseria meningitidis recruits**  
1205 **factor H using protein mimicry of host carbohydrates.** *Nature* 2009; 458(7240):890-893.
- 1206 16. Lewis LA, Gulati S, Burrowes E, Zheng B, Ram S, Rice PA. **alpha-2,3-sialyltransferase expression level**  
1207 **impacts the kinetics of lipooligosaccharide sialylation, complement resistance, and the ability of Neisseria**  
1208 **gonorrhoeae to colonize the murine genital tract.** *MBio* 2015; 6(1).
- 1209 17. Ram S, Cullinane M, Blom AM, Gulati S, McQuillen DP, Monks BG, et al. **Binding of C4b-binding**  
1210 **protein to porin: a molecular mechanism of serum resistance of Neisseria gonorrhoeae.** *The Journal of*  
1211 *experimental medicine* 2001; 193(3):281-295.
- 1212 18. Deo P, Chow SH, Hay ID, Kleifeld O, Costin A, Elgass KD, et al. **Outer membrane vesicles from**  
1213 **Neisseria gonorrhoeae target PorB to mitochondria and induce apoptosis.** *PLoS Pathog* 2018;  
1214 14(3):e1006945.
- 1215 19. Plummer FA, Chubb H, Simonsen JN, Bosire M, Slaney L, Maclean I, et al. **Antibody to Rmp (outer**  
1216 **membrane protein 3) increases susceptibility to gonococcal infection.** *The Journal of clinical investigation*  
1217 1993; 91(1):339-343.
- 1218 20. Rice PA, Vayo HE, Tam MR, Blake MS. **Immunoglobulin G antibodies directed against protein III**  
1219 **block killing of serum-resistant Neisseria gonorrhoeae by immune serum.** *The Journal of experimental*  
1220 *medicine* 1986; 164(5):1735-1748.
- 1221 21. Feavers IM, Maiden MCJ. **Recent Progress in the Prevention of Serogroup B Meningococcal Disease.**  
1222 *Clinical and vaccine immunology : CVI* 2017; 24(5).
- 1223 22. Petousis-Harris H, Paynter J, Morgan J, Saxton P, McArdle B, Goodyear-Smith F, et al. **Effectiveness of a**  
1224 **group B outer membrane vesicle meningococcal vaccine against gonorrhoea in New Zealand: a**  
1225 **retrospective case-control study.** *Lancet* 2017; 390(10102):1603-1610.
- 1226 23. Ladhani SN, Campbell H, Parikh SR, Saliba V, Borrow R, Ramsay M. **The introduction of the**  
1227 **meningococcal B (MenB) vaccine (Bexsero(R)) into the national infant immunisation programme--New**  
1228 **challenges for public health.** *J Infect* 2015; 71(6):611-614.
- 1229 24. Plummer FA, Simonsen JN, Chubb H, Slaney L, Kimata J, Bosire M, et al. **Epidemiologic evidence for the**  
1230 **development of serovar-specific immunity after gonococcal infection.** *The Journal of clinical investigation*  
1231 1989; 83(5):1472-1476.
- 1232 25. Semchenko EA, Tan A, Borrow R, Seib KL. **The serogroup B meningococcal vaccine Bexsero elicits**  
1233 **antibodies to Neisseria gonorrhoeae.** *Clin Infect Dis* 2018.
- 1234 26. Perrett KP, McVernon J, Richmond PC, Marshall H, Nissen M, August A, et al. **Immune responses to a**  
1235 **recombinant, four-component, meningococcal serogroup B vaccine (4CMenB) in adolescents: a phase III,**  
1236 **randomized, multicentre, lot-to-lot consistency study.** *Vaccine* 2015; 33(39):5217-5224.
- 1237 27. McNeil MM, Weintraub ES, Duffy J, Sukumaran L, Jacobsen SJ, Klein NP, et al. **Risk of anaphylaxis after**  
1238 **vaccination in children and adults.** *J Allergy Clin Immunol* 2016; 137(3):868-878.
- 1239 28. Rollier CS, Dold C, Marsay L, Sadarangani M, Pollard AJ. **The capsular group B meningococcal vaccine,**  
1240 **4CMenB : clinical experience and potential efficacy.** *Expert Opin Biol Ther* 2015; 15(1):131-142.
- 1241 29. Oviedo-Orta E, Ahmed S, Rappuoli R, Black S. **Prevention and control of meningococcal outbreaks: The**  
1242 **emerging role of serogroup B meningococcal vaccines.** *Vaccine* 2015; 33(31):3628-3635.
- 1243 30. Newman L, Rowley J, Vander Hoorn S, Wijesooriya NS, Unemo M, Low N, et al. **Global Estimates of the**  
1244 **Prevalence and Incidence of Four Curable Sexually Transmitted Infections in 2012 Based on Systematic**  
1245 **Review and Global Reporting.** *PLoS One* 2015; 10(12):e0143304.
- 1246 31. Galvin SR, Cohen MS. **The role of sexually transmitted diseases in HIV transmission.** *Nat Rev Microbiol*  
1247 2004; 2(1):33-42.
- 1248 32. Wi T, Lahra MM, Ndowa F, Bala M, Dillon JR, Ramon-Pardo P, et al. **Antimicrobial resistance in**  
1249 **Neisseria gonorrhoeae: Global surveillance and a call for international collaborative action.** *PLoS Med*  
1250 2017; 14(7):e1002344.

1251 33. Awanye AM, Chang CM, Wheeler JX, Chan H, Marsay L, Dold C, et al. **Immunogenicity profiling of**  
1252 **protein antigens from capsular group B *Neisseria meningitidis***. *Scientific reports* 2019; 9(1):6843.

1253

1254

1255
