# Supplementary material for: Profiling IgG and IgA antibody responses during vaccination and infection in a high-risk gonorrhoea population
Source: PubMed Central journal article supplement (PMC11306574; doi:10.1038/s41467-024-51053-x), 2024-08-07
Supplement: 41467_2024_51053_MOESM3_ESM.pdf [file 41467_2024_51053_MOESM3_ESM.pdf]

## **Description of Additional Supplementary Files**

**Supplementary Data 1: Table of antigens used for the microarray.** Antigens are listed by common name, and NGO and NEIS designation numbers.
